# Supplementary material
Source: MDPI journal article supplement (https://www.mdpi.com/2073-4395/12/10/2461)
Supplement: s1 [file s1]

**a**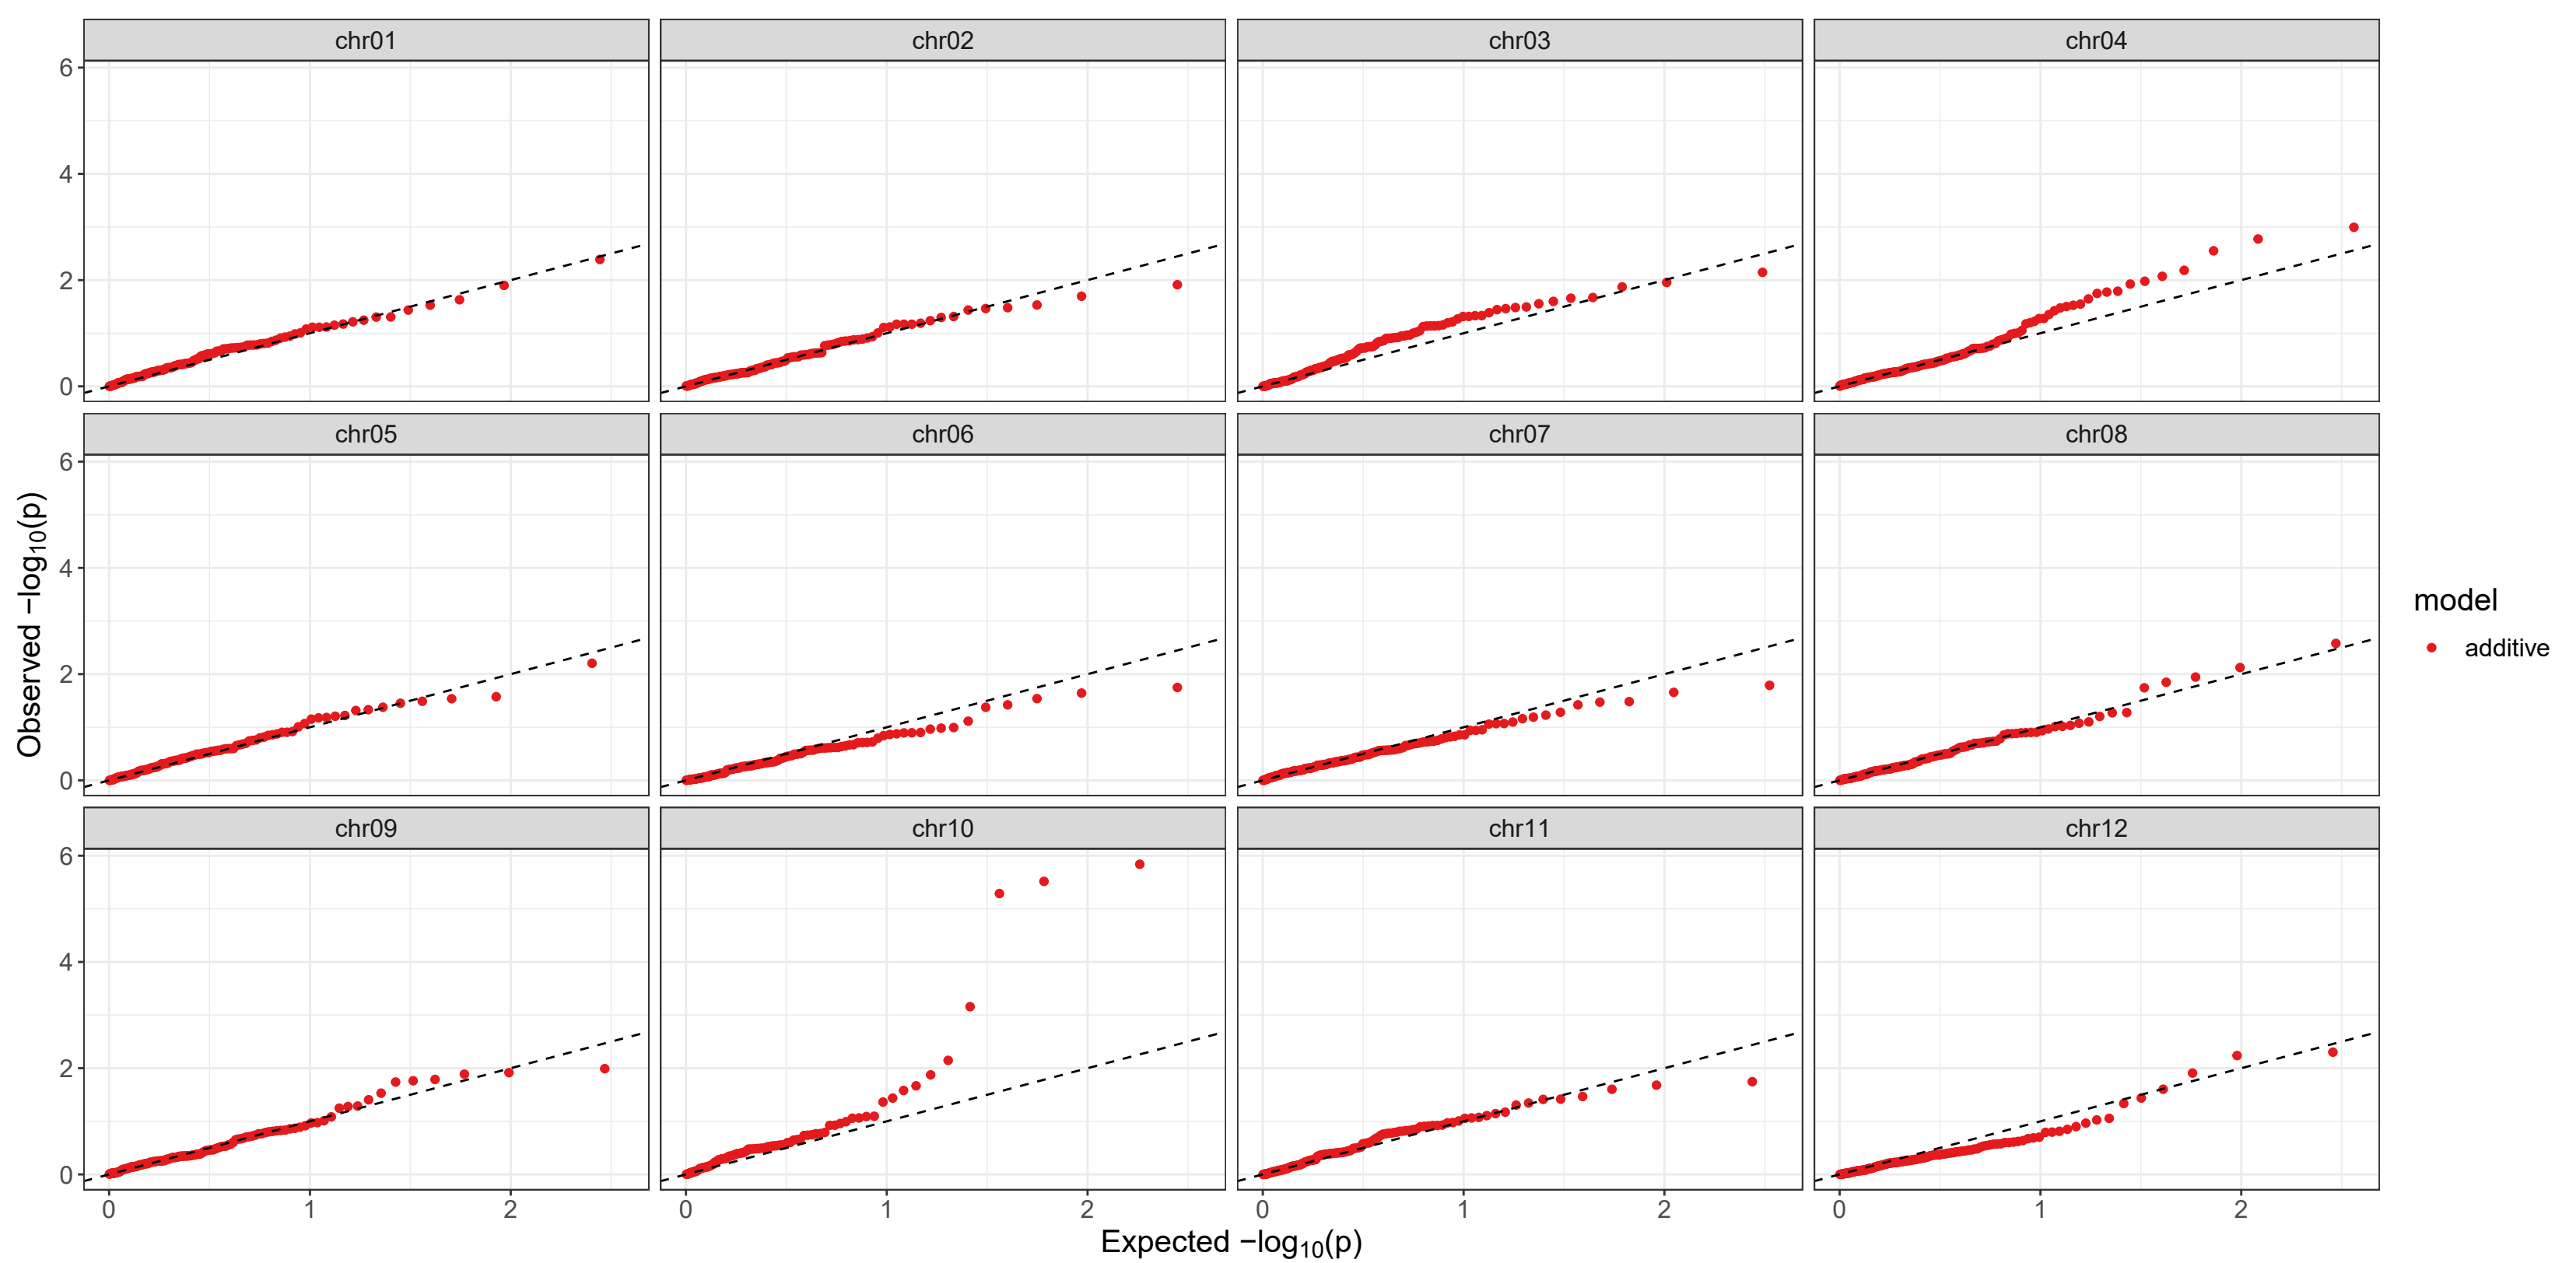

Figure S5. (a) QQ-Plots for 'off the field' fry color in 2017 population with the multi allelic haplotypes

**b**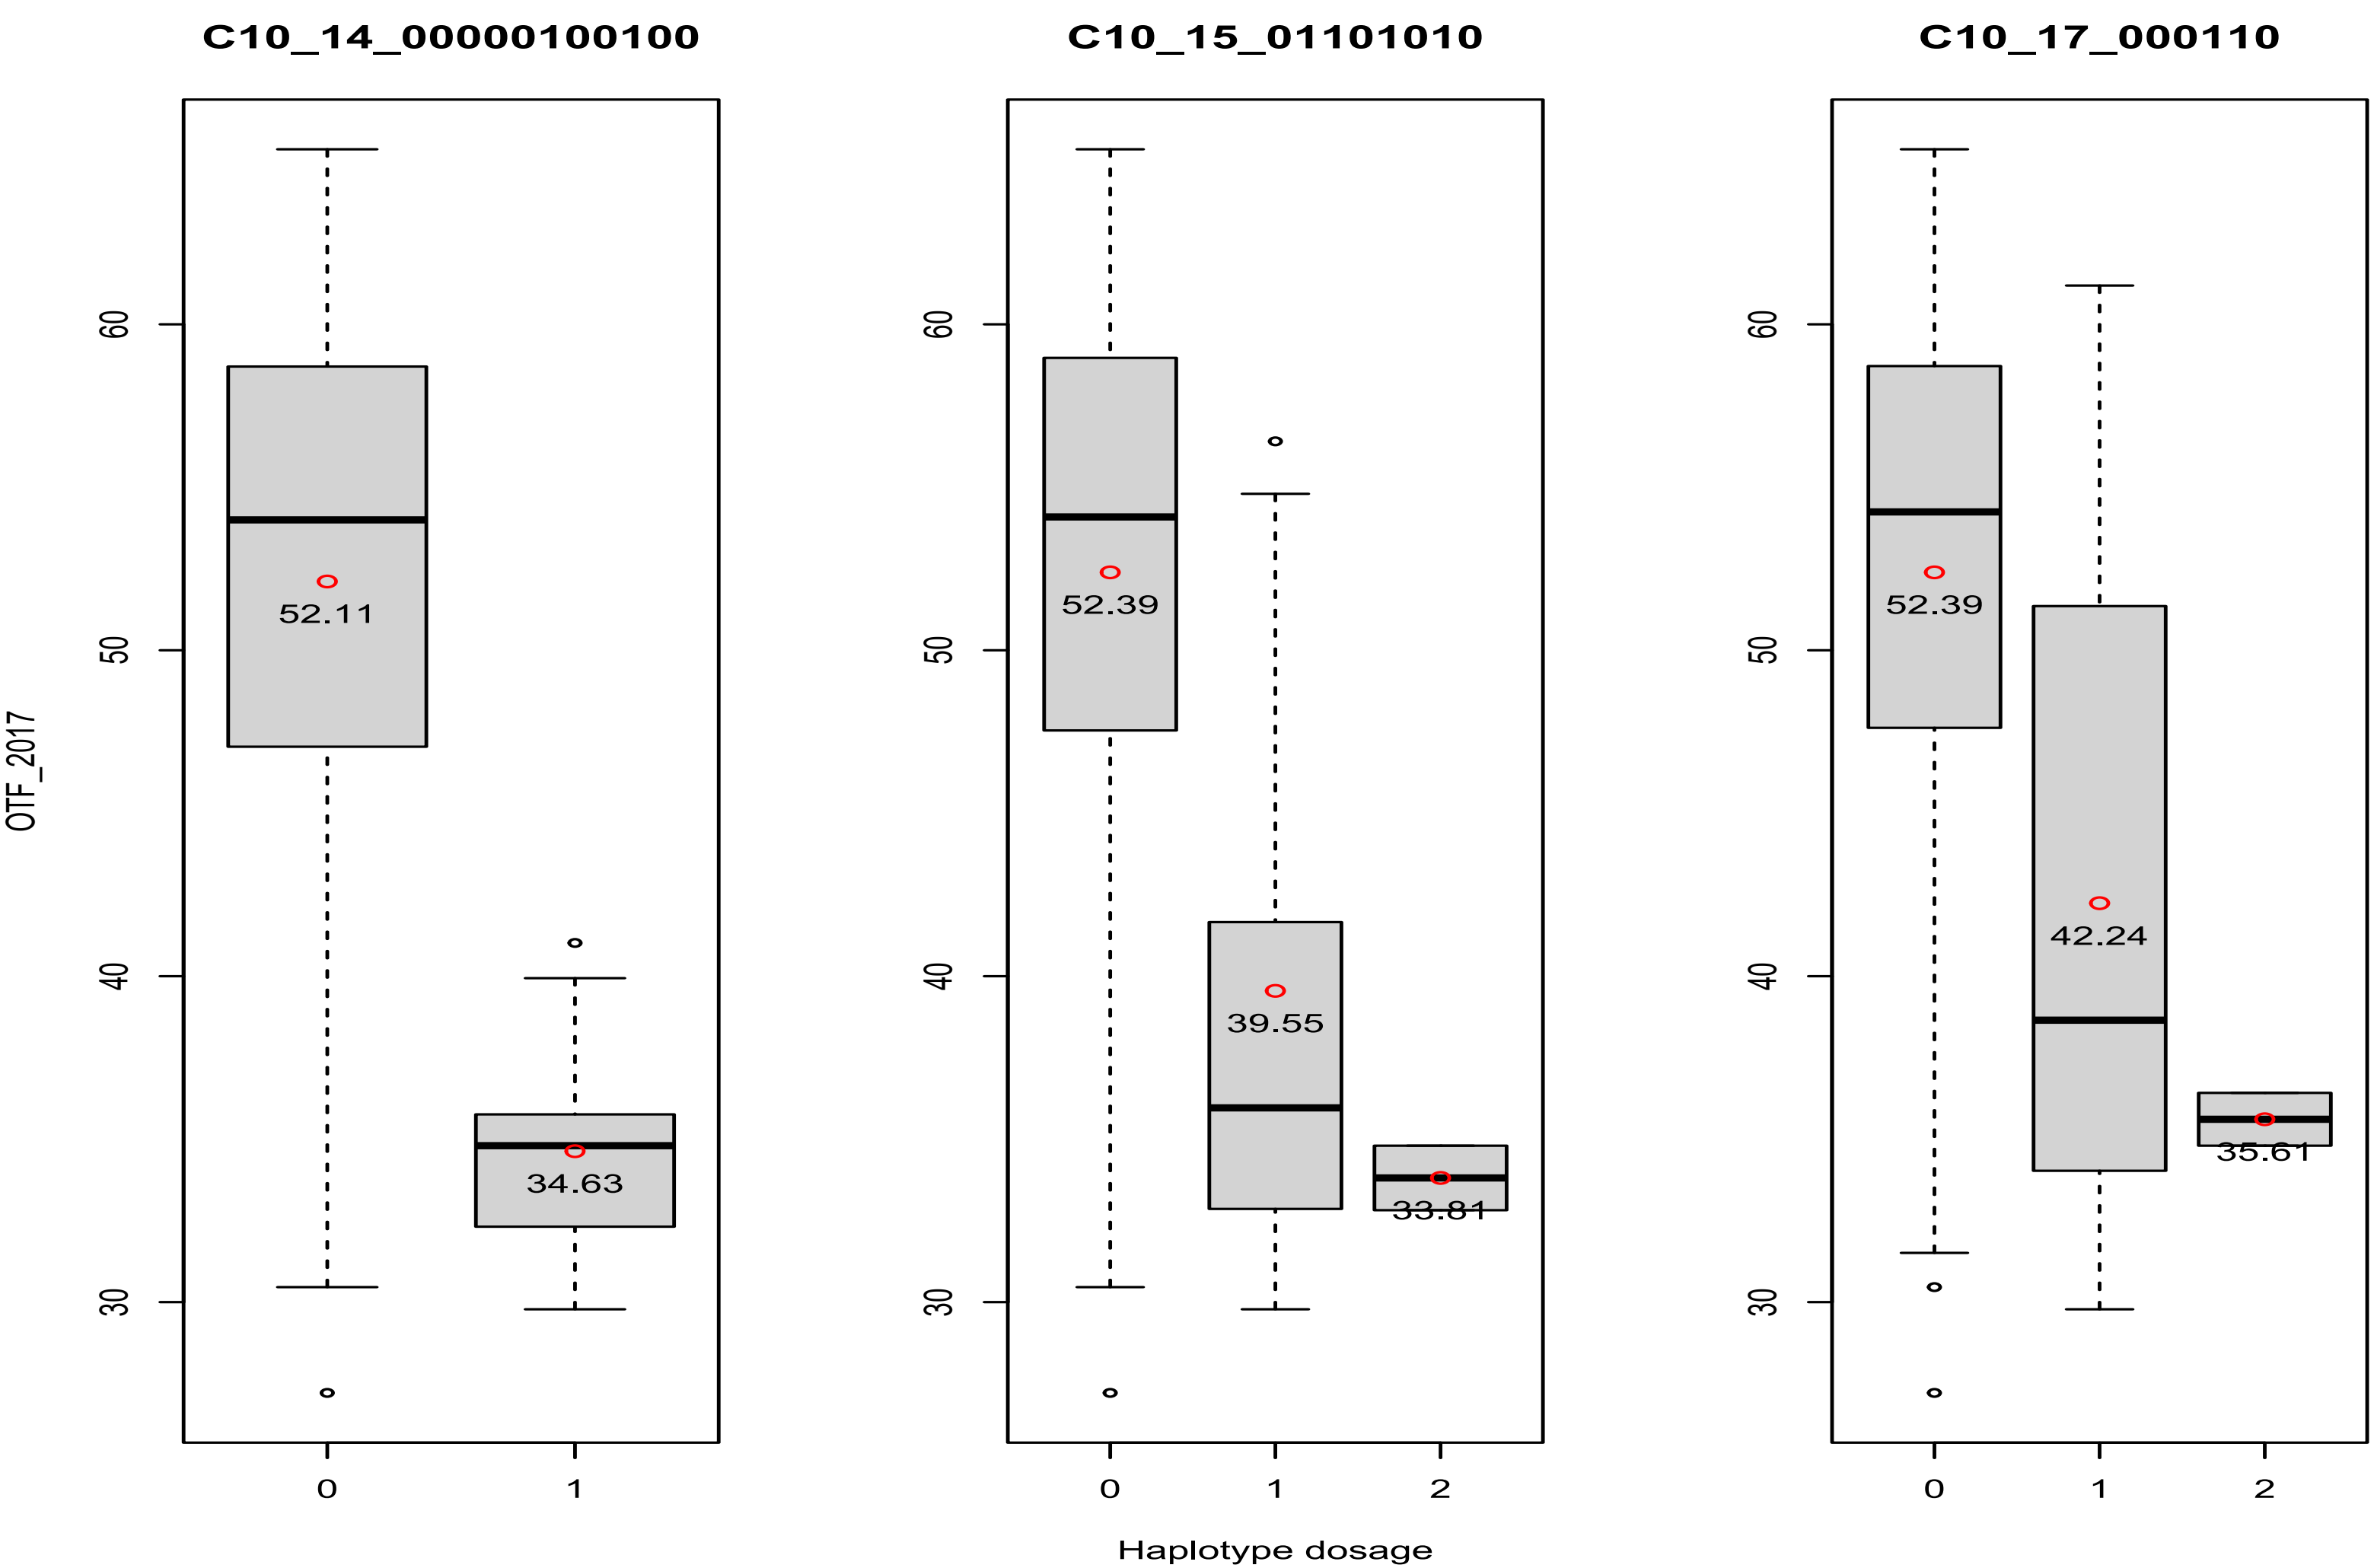

Figure S5. (b) Allelic effects of the significant multi-allelic haplotypes associated with OTF fry color
