# Supplementary material
Source: MDPI journal article supplement (https://www.mdpi.com/2073-4395/12/10/2461)
Supplement: s1 [file s1]

**a**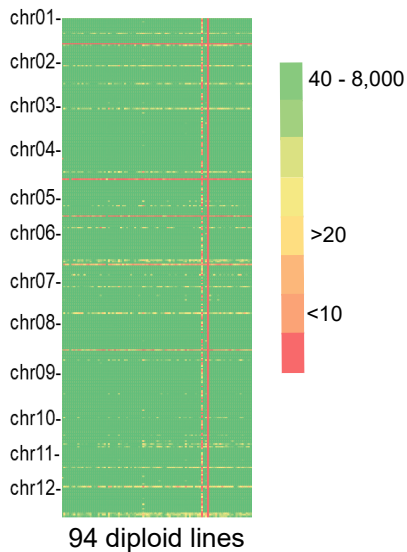**b**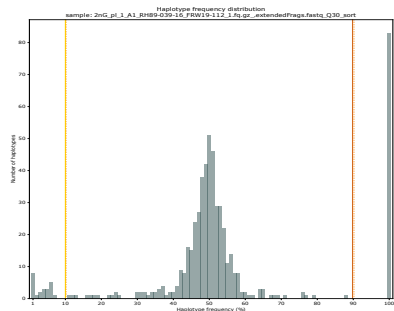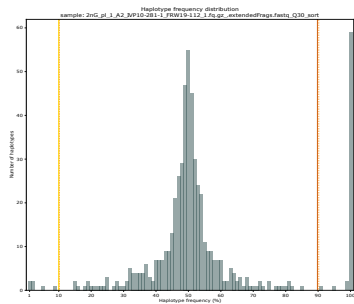

**Figure S7. (a)** coverage heat map of the diploid mapping population **(b)** Multiallelic haplotypes profile of the parental lines; H89-039-16 (up) IVP10-281-1 (down)
