# Supplementary material
Source: MDPI journal article supplement (https://www.mdpi.com/2073-4395/12/10/2461)
Supplement: s1 [file s1]

**PCR1: PotatoMASH core primers**

>C1\_1\_F  
TCGTCGGCAGCGTCAGATGTGTATAAGAGACAGCGAGCTCTCTGAATTCGGATTG  
>C1\_1\_R  
GTCTCGTGGGCTCGGAGATGTGTATAAGAGACAGCCATATGAATACCCACTGGCAGGAT  
>C1\_2\_F  
TCGTCGGCAGCGTCAGATGTGTATAAGAGACAGTGACAGGCTCTTCATTGATCCTTCA  
>C1\_2\_R  
GTCTCGTGGGCTCGGAGATGTGTATAAGAGACAGGCAAGCAGCTCGAGAATTTGTAATG  
>C1\_3\_F  
TCGTCGGCAGCGTCAGATGTGTATAAGAGACAGTTGAAAAGCCACCTCAGAATGTACG  
>C1\_3\_R  
GTCTCGTGGGCTCGGAGATGTGTATAAGAGACAGTGCAGAAGCTTGTGAAATCCATGAA  
>C1\_4\_F  
TCGTCGGCAGCGTCAGATGTGTATAAGAGACAGTTCATCTGGATCCTTGGTATCAGC  
>C1\_4\_R  
GTCTCGTGGGCTCGGAGATGTGTATAAGAGACAGAAGGCATCCTCTCTATCACAAGGAC  
>C1\_5\_F  
TCGTCGGCAGCGTCAGATGTGTATAAGAGACAGCCATTAAATGCCAGCTGATCCTG  
>C1\_5\_R  
GTCTCGTGGGCTCGGAGATGTGTATAAGAGACAGGCATCCTGCAAAGAAGGGGAAATA  
>C1\_6\_F  
TCGTCGGCAGCGTCAGATGTGTATAAGAGACAGTTGGTCCCATGATATCTGGTGGTTT  
>C1\_6\_R  
GTCTCGTGGGCTCGGAGATGTGTATAAGAGACAGTTTTTCATTGGTTCACCCACTGGATG  
>C1\_7\_F  
TCGTCGGCAGCGTCAGATGTGTATAAGAGACAGGCATGAGTTCCTTGGCTCTCTCAC  
>C1\_7\_R  
GTCTCGTGGGCTCGGAGATGTGTATAAGAGACAGTGTGGGGTCGTTCAAGTGAATGA  
>C1\_8\_F  
TCGTCGGCAGCGTCAGATGTGTATAAGAGACAGCAGCTGATGCCTTTTCACTGATTGG  
>C1\_8\_R  
GTCTCGTGGGCTCGGAGATGTGTATAAGAGACAGCTCCTGATTGAGTACCTTGTACCCA  
>C1\_9\_F  
TCGTCGGCAGCGTCAGATGTGTATAAGAGACAGAGACCTGCAACCTAATAACCACTCC  
>C1\_9\_R  
GTCTCGTGGGCTCGGAGATGTGTATAAGAGACAGGGGAGGGATAGTCTAGTGAAAGGA  
>C1\_10\_F  
TCGTCGGCAGCGTCAGATGTGTATAAGAGACAGCATACCAAGCTAACCAAATGGCAGG  
>C1\_10\_R  
GTCTCGTGGGCTCGGAGATGTGTATAAGAGACAGCCCAGAAAGTTTGGAGTTGTTGCTG  
>C1\_11\_2\_F  
TCGTCGGCAGCGTCAGATGTGTATAAGAGACAGCCTAGAGCGTACTGGGCATTATCTA  
>C1\_11\_2\_R  
GTCTCGTGGGCTCGGAGATGTGTATAAGAGACAGAGGCAATTTGAAGGATGCAAGTGC  
>C1\_12\_F  
TCGTCGGCAGCGTCAGATGTGTATAAGAGACAGAAGAATACTCTTCTCTCCGCTACCG  
>C1\_12\_R  
GTCTCGTGGGCTCGGAGATGTGTATAAGAGACAGAGTTAACGTAAGTACTAGAACTAGACGTGCT  
>C1\_13\_F  
TCGTCGGCAGCGTCAGATGTGTATAAGAGACAGGCAAACTGCATGAAGGTGATAAGCA  
>C1\_13\_R  
GTCTCGTGGGCTCGGAGATGTGTATAAGAGACAGTGGGGGTGTAAGGGGCATT  
>C1\_14\_F  
TCGTCGGCAGCGTCAGATGTGTATAAGAGACAGTGTGTTTATCCTCGGTTTGCTGGAAC  
>C1\_14\_R  
GTCTCGTGGGCTCGGAGATGTGTATAAGAGACAGGTTGAAGAACAGTCCGTACAGCTTT

>C1\_15\_F  
TCGTCGGCAGCGTCAGATGTGTATAAGAGACAGGAAAGTGACATGTTAGAACTCACCTTC  
>C1\_15\_R  
GTCTCGTGGGCTCGGAGATGTGTATAAGAGACAGATCCTGGTACGTCCTTAGTTTGCAT  
>C1\_16\_F  
TCGTCGGCAGCGTCAGATGTGTATAAGAGACAGGGTGATATGAAGCATCCCCAAAGCA  
>C1\_16\_R  
GTCTCGTGGGCTCGGAGATGTGTATAAGAGACAGGCAATGGCTAGCCTTTCCTATGAA  
>C1\_17\_F  
TCGTCGGCAGCGTCAGATGTGTATAAGAGACAGTTCCTGTTAAGTTGTGGGGAAGAT  
>C1\_17\_R  
GTCTCGTGGGCTCGGAGATGTGTATAAGAGACAGCTTCAGCTATACACATCCAGTTGC  
>C1\_18\_F  
TCGTCGGCAGCGTCAGATGTGTATAAGAGACAGCAGCACGTTCTAAGAAGTGAAAA  
>C1\_18\_R  
GTCTCGTGGGCTCGGAGATGTGTATAAGAGACAGCTGGTGGTGAGGGAGTTCTGGTAT  
>C1\_19\_F  
TCGTCGGCAGCGTCAGATGTGTATAAGAGACAGTGGAGCTACGGCATACTCATATAGC  
>C1\_19\_R  
GTCTCGTGGGCTCGGAGATGTGTATAAGAGACAGCTGTGCTGCCTTGTCTTAGAAACA  
>C1\_20\_F  
TCGTCGGCAGCGTCAGATGTGTATAAGAGACAGTTAGCTTTAGCCAGAAACATGCAGC  
>C1\_20\_R  
GTCTCGTGGGCTCGGAGATGTGTATAAGAGACAGCAATTACATTCACTTGTGACCGCCT  
>C1\_21\_F  
TCGTCGGCAGCGTCAGATGTGTATAAGAGACAGTGATAGCTGCTCCACTGATGATTCC  
>C1\_21\_R  
GTCTCGTGGGCTCGGAGATGTGTATAAGAGACAGTTGGCATTGAAAAGGAGAGTACGT  
>C1\_22\_F  
TCGTCGGCAGCGTCAGATGTGTATAAGAGACAGGAATAAAGAGCAAAAGACCCCGTCC  
>C1\_22\_R  
GTCTCGTGGGCTCGGAGATGTGTATAAGAGACAGAGAATGGAGAAGCAGCCGAGG  
>C1\_23\_F  
TCGTCGGCAGCGTCAGATGTGTATAAGAGACAGTGTAATGCACCCTGCTCCTATGTAG  
>C1\_23\_R  
GTCTCGTGGGCTCGGAGATGTGTATAAGAGACAGTCAACTTGCTTTGACGTAAGCCAC  
>C1\_24\_1\_F  
TCGTCGGCAGCGTCAGATGTGTATAAGAGACAGGCAAGCTTTCTCACTGCTCTATTGG  
>C1\_24\_1\_R  
GTCTCGTGGGCTCGGAGATGTGTATAAGAGACAGGTTTGGAGTCTTCGGATGCGGATTT  
>C1\_25\_F  
TCGTCGGCAGCGTCAGATGTGTATAAGAGACAGTTGTACAGATGTTGCTTTCCCATGC  
>C1\_25\_R  
GTCTCGTGGGCTCGGAGATGTGTATAAGAGACAGTCTTCTCCATTGTAAGTCTGCTCAA  
>C1\_26\_F  
TCGTCGGCAGCGTCAGATGTGTATAAGAGACAGACATATCTAATTACAAGCCTGAGGTAAGGG  
>C1\_26\_R  
GTCTCGTGGGCTCGGAGATGTGTATAAGAGACAGCTGTTTGATGCTGAAAATTGCTGAGG  
>C1\_27\_F  
TCGTCGGCAGCGTCAGATGTGTATAAGAGACAGTCTGATAAGTTGTTCAAGAGATAGCG  
>C1\_27\_R  
GTCTCGTGGGCTCGGAGATGTGTATAAGAGACAGACTGGCATTGGTTCCTATTACAGCT  
>C1\_28\_F  
TCGTCGGCAGCGTCAGATGTGTATAAGAGACAGCTGGAGCCTGCAGGAGTTATAAAGT  
>C1\_28\_R  
GTCTCGTGGGCTCGGAGATGTGTATAAGAGACAGTCTTTTTCCATTCTTTGGCCTCC  
>C1\_29\_F

TCGTCGGCAGCGTCAGATGTGTATAAGAGACAGCACATTACAGAAGCTGCCGAACAAT  
>C1\_29\_R  
GTCTCGTGGGCTCGGAGATGTGTATAAGAGACAGTCCCTCCTTTTACTGGCAAGAAGA  
>C1\_30\_F  
TCGTCGGCAGCGTCAGATGTGTATAAGAGACAGGGAAAGGCAGTTATGGAAGAAAGCA  
>C1\_30\_R  
GTCTCGTGGGCTCGGAGATGTGTATAAGAGACAGCTTCCTGCCCTAATATCTCCGTGA  
>C1\_31\_F  
TCGTCGGCAGCGTCAGATGTGTATAAGAGACAGTGCCCATCACATTTTGGTGCTAAAT  
>C1\_31\_R  
GTCTCGTGGGCTCGGAGATGTGTATAAGAGACAGCCCAATAATTTCAATTCAGCAGGT  
>C1\_32\_F  
TCGTCGGCAGCGTCAGATGTGTATAAGAGACAGAGTGACAATATCTGGGGAACAACCA  
>C1\_32\_R  
GTCTCGTGGGCTCGGAGATGTGTATAAGAGACAGTGGAAGGATGAATCTGCAATGAGA  
>C1\_33\_F  
TCGTCGGCAGCGTCAGATGTGTATAAGAGACAGGTTGCGAGCTAATACCCAAGGTAAC  
>C1\_33\_R  
GTCTCGTGGGCTCGGAGATGTGTATAAGAGACAGCATGCTGGCGAGGTTTGATTTATAT  
>C1\_34\_F  
TCGTCGGCAGCGTCAGATGTGTATAAGAGACAGTCATGCTGGTGAGTTTCAATTGTGCG  
>C1\_34\_R  
GTCTCGTGGGCTCGGAGATGTGTATAAGAGACAGTCTCAGGTCATTGAATTCCTGTTTCC  
>C1\_35\_F  
TCGTCGGCAGCGTCAGATGTGTATAAGAGACAGGAACAGTTCAAAGATGGGTCCTTGG  
>C1\_35\_R  
GTCTCGTGGGCTCGGAGATGTGTATAAGAGACAGACAATAGGAAACAATTGGCTGAAGC  
>C1\_36\_F  
TCGTCGGCAGCGTCAGATGTGTATAAGAGACAGAAAGCTTCAATTATGCCGATGCCAA  
>C1\_36\_R  
GTCTCGTGGGCTCGGAGATGTGTATAAGAGACAGCTTAGGACTCATGCTCCGACTTTTA  
>C1\_37\_F  
TCGTCGGCAGCGTCAGATGTGTATAAGAGACAGCCAAAGTTCTTCTGACTCTCCGA  
>C1\_37\_R  
GTCTCGTGGGCTCGGAGATGTGTATAAGAGACAGGATCTAAAGGTGTGTCCCATCCTCC  
>C2\_1\_F  
TCGTCGGCAGCGTCAGATGTGTATAAGAGACAGTGCTGACCAAGAATTCTATCTGGGG  
>C2\_1\_R  
GTCTCGTGGGCTCGGAGATGTGTATAAGAGACAGAAAAAGGTTGGGACACTTGTGATGT  
>C2\_2\_F  
TCGTCGGCAGCGTCAGATGTGTATAAGAGACAGCTGACAACTTAAGGGTGAGGTTAGA  
>C2\_2\_R  
GTCTCGTGGGCTCGGAGATGTGTATAAGAGACAGTTTATGGCATTGGTAGTTGCAACCA  
>C2\_3\_F  
TCGTCGGCAGCGTCAGATGTGTATAAGAGACAGTGAGAAAAGGATTGGTGAGTGA  
>C2\_3\_R  
GTCTCGTGGGCTCGGAGATGTGTATAAGAGACAGGCATAAACGCCGTAATATCTGTTGC  
>C2\_4\_F  
TCGTCGGCAGCGTCAGATGTGTATAAGAGACAGTCTATGCTTTTCTCACATCAGCAACC  
>C2\_4\_R  
GTCTCGTGGGCTCGGAGATGTGTATAAGAGACAGATCGCAAGCGTTGATCTCGTCATTT  
>C2\_5\_F  
TCGTCGGCAGCGTCAGATGTGTATAAGAGACAGGAGAATCTCCAGCTTTAGAGGACCC  
>C2\_5\_R  
GTCTCGTGGGCTCGGAGATGTGTATAAGAGACAGATGACAGAAATTGCATGGCTTTCCT  
>C2\_6\_F  
TCGTCGGCAGCGTCAGATGTGTATAAGAGACAGTCGGTATAGTTGTCGTTGTAGCTCC

>C2\_6\_R  
GTCTCGTGGGCTCGGAGATGTGTATAAGAGACAGGCTCTGTAGATAGCTTGGAGGCATA  
>C2\_7\_F  
TCGTCGGCAGCGTCAGATGTGTATAAGAGACAGAGACAAGAAAATGCCCTCCCAAATC  
>C2\_7\_R  
GTCTCGTGGGCTCGGAGATGTGTATAAGAGACAGTGACCAGCCTTACAATACACATTCA  
>C2\_8\_F  
TCGTCGGCAGCGTCAGATGTGTATAAGAGACAGGTGCTGCTTCAATTGTGGGAGAATA  
>C2\_8\_R  
GTCTCGTGGGCTCGGAGATGTGTATAAGAGACAGTGCTGAAGGTGACAATTGTGTGATT  
>C2\_9\_F  
TCGTCGGCAGCGTCAGATGTGTATAAGAGACAGTTTGTGAGGATGTGCTTGTGAGTG  
>C2\_9\_R  
GTCTCGTGGGCTCGGAGATGTGTATAAGAGACAGTTTCAAGTCCTTGGACTCAATTGCC  
>C2\_10\_F  
TCGTCGGCAGCGTCAGATGTGTATAAGAGACAGCCTCCAATAGGCTCAGGAAATTGTT  
>C2\_10\_R  
GTCTCGTGGGCTCGGAGATGTGTATAAGAGACAGTGGTGAAATGTTCTTCTGTTAACACCC  
>C2\_11\_F  
TCGTCGGCAGCGTCAGATGTGTATAAGAGACAGCACAAATCATCCAATCTTGACATTGCTG  
>C2\_11\_R  
GTCTCGTGGGCTCGGAGATGTGTATAAGAGACAGAGAACATTGTACCTAGTGATGCAA  
>C2\_12\_F  
TCGTCGGCAGCGTCAGATGTGTATAAGAGACAGTCAATGAGTTGGTCTACCTTTTACCCT  
>C2\_12\_R  
GTCTCGTGGGCTCGGAGATGTGTATAAGAGACAGTGCTGATATTTTAGGAGGACTTTCCCA  
>C2\_13\_F  
TCGTCGGCAGCGTCAGATGTGTATAAGAGACAGTGCATAGTTACCTGCATTACTTGGG  
>C2\_13\_R  
GTCTCGTGGGCTCGGAGATGTGTATAAGAGACAGGCTCAGGCTGTCAGTCAATTTTGAC  
>C2\_14\_F  
TCGTCGGCAGCGTCAGATGTGTATAAGAGACAGACTCTAATCCCAACATGCGACTACA  
>C2\_14\_R  
GTCTCGTGGGCTCGGAGATGTGTATAAGAGACAGGGTTCTTTCTGCATAGCCCTTTTCC  
>C2\_15\_F  
TCGTCGGCAGCGTCAGATGTGTATAAGAGACAGACTTGAGCAGAGGAACGAGGAAAAT  
>C2\_15\_R  
GTCTCGTGGGCTCGGAGATGTGTATAAGAGACAGTGGCTATGGGTTTACAGAAATCACC  
>C2\_16\_F  
TCGTCGGCAGCGTCAGATGTGTATAAGAGACAGCCTTGGTCGACTTCTGATCAACCTC  
>C2\_16\_R  
GTCTCGTGGGCTCGGAGATGTGTATAAGAGACAGTGGCGTTAAATCCTAGTAGTAGAATGG  
>C2\_17\_F  
TCGTCGGCAGCGTCAGATGTGTATAAGAGACAGGACTAGCCAACTGGTCCATCAAAAC  
>C2\_17\_R  
GTCTCGTGGGCTCGGAGATGTGTATAAGAGACAGGGTAAGAGCCTTTGTAATGTTCCCG  
>C2\_18\_F  
TCGTCGGCAGCGTCAGATGTGTATAAGAGACAGGTCTTCAAGAGCTGTGCAATATGCT  
>C2\_18\_R  
GTCTCGTGGGCTCGGAGATGTGTATAAGAGACAGTCCCTTGTAACCTGAATCAAGCT  
>C2\_19\_F  
TCGTCGGCAGCGTCAGATGTGTATAAGAGACAGCCATCGCGTTTCCAGATCTTATACG  
>C2\_19\_R  
GTCTCGTGGGCTCGGAGATGTGTATAAGAGACAGCAGCATCATCATTTAGGTGCTTGGT  
>C2\_20\_F  
TCGTCGGCAGCGTCAGATGTGTATAAGAGACAGACCCAAATATCCAAAACCCCTAAACCC  
>C2\_20\_R

GTCTCGTGGGCTCGGAGATGTGTATAAGAGACAGGAGAGAGCTCAACGTCAGTCATGG  
>C2\_21\_F  
TCGTCGGCAGCGTCAGATGTGTATAAGAGACAGACAAAGTTCCCAGTGACCTGTTTTTC  
>C2\_21\_R  
GTCTCGTGGGCTCGGAGATGTGTATAAGAGACAGACAGTATGGTCTTGCTGTCAGAATC  
>C2\_22\_F  
TCGTCGGCAGCGTCAGATGTGTATAAGAGACAGGCTCAGAACTGTGGTGATCTCATC  
>C2\_22\_R  
GTCTCGTGGGCTCGGAGATGTGTATAAGAGACAGTCAATGGGTGCATCCGAATCAGTTC  
>C2\_23\_C2\_B4\_F  
TCGTCGGCAGCGTCAGATGTGTATAAGAGACAGGCAACAGTGTGAGATCGAGTAGGAA  
>C2\_23\_C2\_B4\_R  
GTCTCGTGGGCTCGGAGATGTGTATAAGAGACAGCCTAGCAGAATGTGGGAGGCTC  
>C2\_24\_F  
TCGTCGGCAGCGTCAGATGTGTATAAGAGACAGTATGATGGCCATGTCCTCCTTAGG  
>C2\_24\_R  
GTCTCGTGGGCTCGGAGATGTGTATAAGAGACAGGGTTGAGGTTGGTGTCTATACTGG  
>C2\_25\_F  
TCGTCGGCAGCGTCAGATGTGTATAAGAGACAGGCTTCAACAACCTCTTCCAATGTT  
>C2\_25\_R  
GTCTCGTGGGCTCGGAGATGTGTATAAGAGACAGCAGTGATACTGTGGGATTCATATCAGA  
>C2\_26\_F  
TCGTCGGCAGCGTCAGATGTGTATAAGAGACAGGACAGAAGCCAATCAAAGGATCACC  
>C2\_26\_R  
GTCTCGTGGGCTCGGAGATGTGTATAAGAGACAGTGCTCTTCAACATGTTTACGTGCT  
>C2\_27\_F  
TCGTCGGCAGCGTCAGATGTGTATAAGAGACAGCCTCTTCTTCATTGATAGACACCCCT  
>C2\_27\_R  
GTCTCGTGGGCTCGGAGATGTGTATAAGAGACAGTATAGACTTCATGTGCGACGAGTCC  
>C2\_28\_F  
TCGTCGGCAGCGTCAGATGTGTATAAGAGACAGGGGTGTTGATGGACAAAGAAGATTCT  
>C2\_28\_R  
GTCTCGTGGGCTCGGAGATGTGTATAAGAGACAGCACCATTGATGATGATTGCTTCGT  
>C2\_29\_F  
TCGTCGGCAGCGTCAGATGTGTATAAGAGACAGCAGAGCATTCCCATGAACCGTCATC  
>C2\_29\_R  
GTCTCGTGGGCTCGGAGATGTGTATAAGAGACAGTCTACATCTTCAGCTAACTACTCGCT  
>C2\_30\_F  
TCGTCGGCAGCGTCAGATGTGTATAAGAGACAGCAAGGTGCTGCGGGAGTTTCTTG  
>C2\_30\_R  
GTCTCGTGGGCTCGGAGATGTGTATAAGAGACAGTCTTGATAAAGCCATAAGCCACAGC  
>C2\_31\_F  
TCGTCGGCAGCGTCAGATGTGTATAAGAGACAGTGGTCAATTCTCACAGAGGGTACAA  
>C2\_31\_R  
GTCTCGTGGGCTCGGAGATGTGTATAAGAGACAGTAGCATTCAAGCTTCCCAAACCATC  
>C3\_1\_F  
TCGTCGGCAGCGTCAGATGTGTATAAGAGACAGTGGTTGAGAAGAGGAAGCTTTCGTA  
>C3\_1\_R  
GTCTCGTGGGCTCGGAGATGTGTATAAGAGACAGTGCAATCTGATTGATTGATGAGAGGC  
>C3\_2\_F  
TCGTCGGCAGCGTCAGATGTGTATAAGAGACAGGATCTGTTCCGGATTGTTTTGCTG  
>C3\_2\_R  
GTCTCGTGGGCTCGGAGATGTGTATAAGAGACAGAACGAAGCATTAAAGGCAAAACCC  
>C3\_3\_F  
TCGTCGGCAGCGTCAGATGTGTATAAGAGACAGTGGTGCGTTGATTAGAGGATTTTGT  
>C3\_3\_R  
GTCTCGTGGGCTCGGAGATGTGTATAAGAGACAGGCACAACCTCAAGAGCCCAATCAAAA

>C3\_4\_F  
TCGTCGGCAGCGTCAGATGTGTATAAGAGACAGCCAGGAAGATCACATTCTAACCATGT  
>C3\_4\_R  
GTCTCGTGGGCTCGGAGATGTGTATAAGAGACAGCCTCTAGACCAAGTAAACCGTTGTAC  
>C3\_5\_F  
TCGTCGGCAGCGTCAGATGTGTATAAGAGACAGGAGAAGGAGAGACACTGCATGCTC  
>C3\_5\_R  
GTCTCGTGGGCTCGGAGATGTGTATAAGAGACAGCCCTTTCTAGAAGATACAGCTCTAGCA  
>C3\_6\_F  
TCGTCGGCAGCGTCAGATGTGTATAAGAGACAGGAATTGCTAGTGACCGCGCAAGAAC  
>C3\_6\_R  
GTCTCGTGGGCTCGGAGATGTGTATAAGAGACAGACATATGGCTTCGCGATAGGATTCT  
>C3\_7\_F  
TCGTCGGCAGCGTCAGATGTGTATAAGAGACAGGAAAGCAGGCACTAGCATTGGAC  
>C3\_7\_R  
GTCTCGTGGGCTCGGAGATGTGTATAAGAGACAGAGGGCCATGTTCTTCTATACCATC  
>C3\_8\_F  
TCGTCGGCAGCGTCAGATGTGTATAAGAGACAGTCTGAAAATAGGGGTACGTGCCTTT  
>C3\_8\_R  
GTCTCGTGGGCTCGGAGATGTGTATAAGAGACAGACTTTTTACCTGCATTACCAGACA  
>C3\_9\_F  
TCGTCGGCAGCGTCAGATGTGTATAAGAGACAGGTTGTTGGACATGAGACTAGGCAAA  
>C3\_9\_R  
GTCTCGTGGGCTCGGAGATGTGTATAAGAGACAGTCTACGAGAGCACAATTCTCCAAC  
>C3\_10\_F  
TCGTCGGCAGCGTCAGATGTGTATAAGAGACAGTGTGCCCTAGAGATTCAATTGATTGG  
>C3\_10\_R  
GTCTCGTGGGCTCGGAGATGTGTATAAGAGACAGCATTTACGCACTAGCAGCAGGC  
>C3\_11\_F  
TCGTCGGCAGCGTCAGATGTGTATAAGAGACAGTGATGAACATCCTCCAAAACGGTT  
>C3\_11\_R  
GTCTCGTGGGCTCGGAGATGTGTATAAGAGACAGGTTTCATCTGGCTTTTGGCTAAAGA  
>C3\_12\_F  
TCGTCGGCAGCGTCAGATGTGTATAAGAGACAGGGCCATTTCTCATCTAGACACTGGA  
>C3\_12\_R  
GTCTCGTGGGCTCGGAGATGTGTATAAGAGACAGGCATTTAGAAGAAGTGCACTGGTCC  
>C3\_13\_F  
TCGTCGGCAGCGTCAGATGTGTATAAGAGACAGGAATATGTTGAAAAGTCTTGGCGCG  
>C3\_13\_R  
GTCTCGTGGGCTCGGAGATGTGTATAAGAGACAGGAAGCAGTTGCACTTCAGGTTCTAC  
>C3\_14\_F  
TCGTCGGCAGCGTCAGATGTGTATAAGAGACAGAATGTAGGAGCAGCATCACCATACT  
>C3\_14\_R  
GTCTCGTGGGCTCGGAGATGTGTATAAGAGACAGTTTCTATCCTCTCGTTTGCATCTGA  
>C3\_15\_F  
TCGTCGGCAGCGTCAGATGTGTATAAGAGACAGTGGAGCTGTTTCATCTGTTGAACAC  
>C3\_15\_R  
GTCTCGTGGGCTCGGAGATGTGTATAAGAGACAGTTGCTCAAGGCTATGAGGATATGGG  
>C3\_16\_F  
TCGTCGGCAGCGTCAGATGTGTATAAGAGACAGCCGAAACCATTATAGAGAGGTGGGT  
>C3\_16\_R  
GTCTCGTGGGCTCGGAGATGTGTATAAGAGACAGTGATGAAAGTTTCCTGAAGGCCTTG  
>C3\_17\_F  
TCGTCGGCAGCGTCAGATGTGTATAAGAGACAGCGCGAACTCAGGCATTACAAATGAA  
>C3\_17\_R  
GTCTCGTGGGCTCGGAGATGTGTATAAGAGACAGACAGCAACAGAAAGTGGATTTTCGA  
>C3\_18\_F

TCGTCGGCAGCGTCAGATGTGTATAAGAGACAGTCCAGGAGCAGAAGAAAGTCAATGA  
>C3\_18\_R  
GTCTCGTGGGCTCGGAGATGTGTATAAGAGACAGACCAAAGTGGAGAGGTCAATGGTAG  
>C3\_19\_F  
TCGTCGGCAGCGTCAGATGTGTATAAGAGACAGACGTATGTCTTGACATTGGCATCG  
>C3\_19\_R  
GTCTCGTGGGCTCGGAGATGTGTATAAGAGACAGTGCATTATTCATCCACCTACTCGGA  
>C3\_20\_F  
TCGTCGGCAGCGTCAGATGTGTATAAGAGACAGCTATCTTGCACTTATCCTTCACCCA  
>C3\_20\_R  
GTCTCGTGGGCTCGGAGATGTGTATAAGAGACAGCGACCGATTAGCCTTTCTAACTAACT  
>C3\_21\_F  
TCGTCGGCAGCGTCAGATGTGTATAAGAGACAGCTTCAAAGACCCGACCTTTGTCAA  
>C3\_21\_R  
GTCTCGTGGGCTCGGAGATGTGTATAAGAGACAGAACGACTTCTCCTAGATGGTTCACC  
>C3\_22\_F  
TCGTCGGCAGCGTCAGATGTGTATAAGAGACAGGCAATTGCTGGAGACTTGTTGTCTT  
>C3\_22\_R  
GTCTCGTGGGCTCGGAGATGTGTATAAGAGACAGTCTGTATTTATTGACAGGCCTGATTGG  
>C3\_23\_F  
TCGTCGGCAGCGTCAGATGTGTATAAGAGACAGACAGCAGAAAGTTAACCTCTCTAGAC  
>C3\_23\_R  
GTCTCGTGGGCTCGGAGATGTGTATAAGAGACAGCCCAATATAATTGATTTGTAGGAGCTCCAG  
>C3\_24\_F  
TCGTCGGCAGCGTCAGATGTGTATAAGAGACAGTTCATCTGGGGTCAATTCTGCAGAA  
>C3\_24\_R  
GTCTCGTGGGCTCGGAGATGTGTATAAGAGACAGCTGTGATGACAACTGGAGCAAATCA  
>C3\_25\_2\_F  
TCGTCGGCAGCGTCAGATGTGTATAAGAGACAGAGTTAACGGGACTTGTGACTCTTCC  
>C3\_25\_2\_R  
GTCTCGTGGGCTCGGAGATGTGTATAAGAGACAGCTGCAACACCTGAGGGATTTGACTC  
>C3\_26\_F  
TCGTCGGCAGCGTCAGATGTGTATAAGAGACAGTGCTACAACCTTCCTTTCTACCCTGT  
>C3\_26\_R  
GTCTCGTGGGCTCGGAGATGTGTATAAGAGACAGTGGAAATCCCATAGAGATTGCCCTG  
>C3\_27\_F  
TCGTCGGCAGCGTCAGATGTGTATAAGAGACAGCACAAGCCTTTGATAACCACATTGT  
>C3\_27\_R  
GTCTCGTGGGCTCGGAGATGTGTATAAGAGACAGGGTTTATGAGGGAATGCTGGAGAGC  
>C3\_28\_F  
TCGTCGGCAGCGTCAGATGTGTATAAGAGACAGTGATATTCGCCACGTGTCTAGAGAA  
>C3\_28\_R  
GTCTCGTGGGCTCGGAGATGTGTATAAGAGACAGCCGACAGCCTCTTCCTCCTCT  
>C3\_29\_F  
TCGTCGGCAGCGTCAGATGTGTATAAGAGACAGTCATCAATTAGGTTCTCCATGGGAAGT  
>C3\_29\_R  
GTCTCGTGGGCTCGGAGATGTGTATAAGAGACAGCACGAAAAATGAGGTAGAATACTGCTC  
>C3\_30\_F  
TCGTCGGCAGCGTCAGATGTGTATAAGAGACAGGCCGTGTTAGAATCTCTTCTTGCAA  
>C3\_30\_R  
GTCTCGTGGGCTCGGAGATGTGTATAAGAGACAGTATCAGGCAAATCAGCTTCTGTGTT  
>C3\_31\_F  
TCGTCGGCAGCGTCAGATGTGTATAAGAGACAGAGATACAAGAACTGACGACCAATCC  
>C3\_31\_R  
GTCTCGTGGGCTCGGAGATGTGTATAAGAGACAGCGTCATAAGATCTTACAGAGTCACTATACACAAGC  
>C4\_1\_F  
TCGTCGGCAGCGTCAGATGTGTATAAGAGACAGCTCGTGTCTTGTGAGATGAAGTTCA

>C4\_1\_R  
GTCTCGTGGGCTCGGAGATGTGTATAAGAGACAGTCAACAATAACCTACCACAATGATCCC  
>C4\_2\_F  
TCGTCGGCAGCGTCAGATGTGTATAAGAGACAGCAAGGCAATCGAAACCTTCAACTCT  
>C4\_2\_R  
GTCTCGTGGGCTCGGAGATGTGTATAAGAGACAGGATTCTGGGATGAGAAGGTCACCC  
>C4\_3\_F  
TCGTCGGCAGCGTCAGATGTGTATAAGAGACAGCCGATTTCTTTCCCGATTGAATC  
>C4\_3\_R  
GTCTCGTGGGCTCGGAGATGTGTATAAGAGACAGACGTGAACATAATTTGGCCTACGTA  
>C4\_4\_F  
TCGTCGGCAGCGTCAGATGTGTATAAGAGACAGTCAGCCAGAACTTTGCTAGAGGTT  
>C4\_4\_R  
GTCTCGTGGGCTCGGAGATGTGTATAAGAGACAGCTGAGGGGCTAGCATCCATGAAG  
>C4\_5\_C4\_B1\_F  
TCGTCGGCAGCGTCAGATGTGTATAAGAGACAGAGTAGTTTACTCATGGGTTCTCGTTC  
>C4\_5\_C4\_B1\_R  
GTCTCGTGGGCTCGGAGATGTGTATAAGAGACAGACTCAAATGGGTTGAAATCATCAGACC  
>C4\_6\_C4\_B2\_F  
TCGTCGGCAGCGTCAGATGTGTATAAGAGACAGCTGATAAGCAGCCTATTGTGCCATG  
>C4\_6\_C4\_B2\_R  
GTCTCGTGGGCTCGGAGATGTGTATAAGAGACAGGCCAACTAAATTCAGCAAATGTAATTTACT  
>C4\_7\_F  
TCGTCGGCAGCGTCAGATGTGTATAAGAGACAGTCCTGACTCCGACTTAGGATAACCA  
>C4\_7\_R  
GTCTCGTGGGCTCGGAGATGTGTATAAGAGACAGGAGAGTGACCAGGGAGCATATACTG  
>C4\_8\_F  
TCGTCGGCAGCGTCAGATGTGTATAAGAGACAGTTCGCGATAGTTATGACATCCATGC  
>C4\_8\_R  
GTCTCGTGGGCTCGGAGATGTGTATAAGAGACAGTCTTTAGGGAATATGTATTGGGGC  
>C4\_9\_F  
TCGTCGGCAGCGTCAGATGTGTATAAGAGACAGACAATCTTCAGTGTTTCTCTGCTCA  
>C4\_9\_R  
GTCTCGTGGGCTCGGAGATGTGTATAAGAGACAGGACGACAGTCAAAATGCTGATGTGA  
>C4\_10\_F  
TCGTCGGCAGCGTCAGATGTGTATAAGAGACAGGTGTTGGTAAATGGAAAACCTAGAAATGGC  
>C4\_10\_R  
GTCTCGTGGGCTCGGAGATGTGTATAAGAGACAGAGAACCCTCAAATACTCCAACATGT  
>C4\_11\_F  
TCGTCGGCAGCGTCAGATGTGTATAAGAGACAGTCATTTTACGCCACATTCCATCTCC  
>C4\_11\_R  
GTCTCGTGGGCTCGGAGATGTGTATAAGAGACAGGCTGAAGTACTATTGAAACAGTAGCAC  
>C4\_12\_F  
TCGTCGGCAGCGTCAGATGTGTATAAGAGACAGAAATCTCTTGACATGCCTTGCTGAC  
>C4\_12\_R  
GTCTCGTGGGCTCGGAGATGTGTATAAGAGACAGGCTGTTACATGCAGATATGGACATCA  
>C4\_13\_F  
TCGTCGGCAGCGTCAGATGTGTATAAGAGACAGTTCGTGTGTGGTATGAAGTCTGACT  
>C4\_13\_R  
GTCTCGTGGGCTCGGAGATGTGTATAAGAGACAGCCTCGGATGTACAGTAAATATGGTTGC  
>C4\_14\_F  
TCGTCGGCAGCGTCAGATGTGTATAAGAGACAGTCCACCAGTAATCTCTGATGAATCGT  
>C4\_14\_R  
GTCTCGTGGGCTCGGAGATGTGTATAAGAGACAGACTTTAGGAAGACCAGATGCTGAGT  
>C4\_15\_F  
TCGTCGGCAGCGTCAGATGTGTATAAGAGACAGTGGTCTTCCTCTTCTCTTTGACA  
>C4\_15\_R

GTCTCGTGGGCTCGGAGATGTGTATAAGAGACAGACTAGACAAGTTCCTCCCTATAGCT  
>C4\_16\_F  
TCGTCGGCAGCGTCAGATGTGTATAAGAGACAGTAATGGAGGTGCTGGAGAGAGGATA  
>C4\_16\_R  
GTCTCGTGGGCTCGGAGATGTGTATAAGAGACAGCATCTGTTTGTGCCCTGCAGATAT  
>C4\_17\_F  
TCGTCGGCAGCGTCAGATGTGTATAAGAGACAGCCTACTTATGACCAACTTTTAGCCCA  
>C4\_17\_R  
GTCTCGTGGGCTCGGAGATGTGTATAAGAGACAGGCGTAAGTAACTTTAACTGATGCTTCCAG  
>C4\_18\_F  
TCGTCGGCAGCGTCAGATGTGTATAAGAGACAGTGATCTCTTGACTCCATCCATGTATCC  
>C4\_18\_R  
GTCTCGTGGGCTCGGAGATGTGTATAAGAGACAGACTGATCATACAACCCATAGAATGC  
>C4\_19\_1\_F  
TCGTCGGCAGCGTCAGATGTGTATAAGAGACAGACAACTCTTGTTGTTGGCCAAAAG  
>C4\_19\_1\_R  
GTCTCGTGGGCTCGGAGATGTGTATAAGAGACAGAGGAGACAGGACACAATTTGCC  
>C4\_20\_F  
TCGTCGGCAGCGTCAGATGTGTATAAGAGACAGAGCTCACCATTCAACATCTGATGAT  
>C4\_20\_R  
GTCTCGTGGGCTCGGAGATGTGTATAAGAGACAGTTGAACCTGTTTTCTGATGTCTCCG  
>C4\_21\_F  
TCGTCGGCAGCGTCAGATGTGTATAAGAGACAGAACCATTCTAGCTGCGGACAGTTG  
>C4\_21\_R  
GTCTCGTGGGCTCGGAGATGTGTATAAGAGACAGCCTGATATTGAAAATTGCACCAGCT  
>C4\_22\_F  
TCGTCGGCAGCGTCAGATGTGTATAAGAGACAGGCTAATAAGTAATCTGGTTTCCCCGG  
>C4\_22\_R  
GTCTCGTGGGCTCGGAGATGTGTATAAGAGACAGCTCTCTAGAGATTGACATCAAATCATGTCC  
>C4\_23\_F  
TCGTCGGCAGCGTCAGATGTGTATAAGAGACAGACAGGCTTTTATTGAAGACACAGCT  
>C4\_23\_R  
GTCTCGTGGGCTCGGAGATGTGTATAAGAGACAGGCCCCATATATGAAAGACTTGGTATTG  
>C4\_24\_F  
TCGTCGGCAGCGTCAGATGTGTATAAGAGACAGGGATCTTATGGATATATTGCTCCAGGT  
>C4\_24\_R  
GTCTCGTGGGCTCGGAGATGTGTATAAGAGACAGTCGCTGTATATCCATATTCTGCAACC  
>C4\_25\_F  
TCGTCGGCAGCGTCAGATGTGTATAAGAGACAGGCAAATGGAAAACTTCAGCTAGAGG  
>C4\_25\_R  
GTCTCGTGGGCTCGGAGATGTGTATAAGAGACAGGACCCATCCGATGATTTAAGCTGC  
>C4\_26\_F  
TCGTCGGCAGCGTCAGATGTGTATAAGAGACAGAGAAGCTTGCTCCTTCACCAATTC  
>C4\_26\_R  
GTCTCGTGGGCTCGGAGATGTGTATAAGAGACAGTCTTCGGACATGGTTTCTACTGGAA  
>C4\_27\_F  
TCGTCGGCAGCGTCAGATGTGTATAAGAGACAGAACATACCCTGTTGCTGCCAAAAAT  
>C4\_27\_R  
GTCTCGTGGGCTCGGAGATGTGTATAAGAGACAGGATGCGCTCTCTATCTGGTTGATA  
>C4\_28\_F  
TCGTCGGCAGCGTCAGATGTGTATAAGAGACAGGCTTTCTGTGTTTTGGACTACAACA  
>C4\_28\_R  
GTCTCGTGGGCTCGGAGATGTGTATAAGAGACAGGGGCCTCTTGAATCATCCCCTTTAT  
>C4\_29\_F  
TCGTCGGCAGCGTCAGATGTGTATAAGAGACAGATTGGCCCGGTGTCAAAACCA  
>C4\_29\_R  
GTCTCGTGGGCTCGGAGATGTGTATAAGAGACAGCTCCAACCAACGCTGATTAATTAGAGT

>C4\_30\_F  
TCGTCGGCAGCGTCAGATGTGTATAAGAGACAGGACAACCCGGGGTGATGTTCT  
>C4\_30\_R  
GTCTCGTGGGCTCGGAGATGTGTATAAGAGACAGTGGTATAGTTGTGCCTGCTAGGTTT  
>C4\_31\_F  
TCGTCGGCAGCGTCAGATGTGTATAAGAGACAGCAATCCTTCAGGCCAGGTTTGATTC  
>C4\_31\_R  
GTCTCGTGGGCTCGGAGATGTGTATAAGAGACAGTGAAGTCAATTTTGGTCCAACAACC  
>C4\_32\_F  
TCGTCGGCAGCGTCAGATGTGTATAAGAGACAGAAGTACTTTGTTCTTCTGTGCGTGC  
>C4\_32\_R  
GTCTCGTGGGCTCGGAGATGTGTATAAGAGACAGGGACCAATCATAAACTGGCTTCAACA  
>C4\_33\_F  
TCGTCGGCAGCGTCAGATGTGTATAAGAGACAGTTGCGAACGTACTCTCAAGATATGA  
>C4\_33\_R  
GTCTCGTGGGCTCGGAGATGTGTATAAGAGACAGCAAAGTCCTAGTAGATATTGACACCGA  
>C4\_34\_F  
TCGTCGGCAGCGTCAGATGTGTATAAGAGACAGTCAGATCTGAGACTTCCCTCCCTTT  
>C4\_34\_R  
GTCTCGTGGGCTCGGAGATGTGTATAAGAGACAGCTGAGAGAGACGCCGTAACCTAATT  
>C4\_35\_F  
TCGTCGGCAGCGTCAGATGTGTATAAGAGACAGATATCAGCTTCTTCCCGGTCAGATC  
>C4\_35\_R  
GTCTCGTGGGCTCGGAGATGTGTATAAGAGACAGGATCTTCTAGACTTGCGGCTTTTG  
>C5\_1\_F  
TCGTCGGCAGCGTCAGATGTGTATAAGAGACAGATGTGGAAAGAGATCTTTATAAACATCATAAGAA  
>C5\_1\_R  
GTCTCGTGGGCTCGGAGATGTGTATAAGAGACAGTTTCTTTAATGAGAGAGACAATCTTCATTTTGT  
>C5\_2\_F  
TCGTCGGCAGCGTCAGATGTGTATAAGAGACAGGGTCACTACCAAAAGATTGCCTCTT  
>C5\_2\_R  
GTCTCGTGGGCTCGGAGATGTGTATAAGAGACAGTCAAGGGCATCACTAGCATTACTGT  
>C5\_3\_F  
TCGTCGGCAGCGTCAGATGTGTATAAGAGACAGAGAGTACTACTAGTGACTCTCTCTCCA  
>C5\_3\_R  
GTCTCGTGGGCTCGGAGATGTGTATAAGAGACAGTGGGAGTTTTCTTGATTCAGCTTCA  
>C5\_4\_F  
TCGTCGGCAGCGTCAGATGTGTATAAGAGACAGACTAGTGTCCGAGCAGCTGTTTTAT  
>C5\_4\_R  
GTCTCGTGGGCTCGGAGATGTGTATAAGAGACAGATTGGAATAACTAGAAGGTTGGGCC  
>C5\_5\_F  
TCGTCGGCAGCGTCAGATGTGTATAAGAGACAGCTCATACGTTTCATGCCTGGTTCAAA  
>C5\_5\_R  
GTCTCGTGGGCTCGGAGATGTGTATAAGAGACAGGGTTCCACATATTAACACCTTGTTCCA  
>C5\_6\_F  
TCGTCGGCAGCGTCAGATGTGTATAAGAGACAGAACAAAGGAAGATTGAAGAGGCTGC  
>C5\_6\_R  
GTCTCGTGGGCTCGGAGATGTGTATAAGAGACAGAGACACTATCTGGATCAGAAGGTTTAC  
>C5\_7\_F  
TCGTCGGCAGCGTCAGATGTGTATAAGAGACAGGCCTCCTAATATTGGCAAATTCAGCA  
>C5\_7\_R  
GTCTCGTGGGCTCGGAGATGTGTATAAGAGACAGCGAGCTGCAGAACTCTGGCTA  
>C5\_8\_F  
TCGTCGGCAGCGTCAGATGTGTATAAGAGACAGCAGATGGAGTTCATAGTTCTTCTAGAGGT  
>C5\_8\_R  
GTCTCGTGGGCTCGGAGATGTGTATAAGAGACAGGTTGGGATGTGTTTGACAGGTAACC  
>C5\_9\_F

TCGTCGGCAGCGTCAGATGTGTATAAGAGACAGTGGTGCATTCCATTAGTAAAGAGGT  
>C5\_9\_R  
GTCTCGTGGGCTCGGAGATGTGTATAAGAGACAGCAGGAGGGAAATTACTGCTCTCTGC  
>C5\_10\_F  
TCGTCGGCAGCGTCAGATGTGTATAAGAGACAGTTCTCACACGACGCGATGAATCTC  
>C5\_10\_R  
GTCTCGTGGGCTCGGAGATGTGTATAAGAGACAGCGTTTCCCAAGTGTTGTTTCGTTA  
>C5\_11\_F  
TCGTCGGCAGCGTCAGATGTGTATAAGAGACAGAGCCTCACTGAAATAACCTGCACA  
>C5\_11\_R  
GTCTCGTGGGCTCGGAGATGTGTATAAGAGACAGTATGGATCTTGTGATGGTCGATGCC  
>C5\_12\_F  
TCGTCGGCAGCGTCAGATGTGTATAAGAGACAGGTCTTCGAAACAGTGGTGGCAATAT  
>C5\_12\_R  
GTCTCGTGGGCTCGGAGATGTGTATAAGAGACAGTGTGGAATGTGTAGCATGTGTGTG  
>C5\_13\_F  
TCGTCGGCAGCGTCAGATGTGTATAAGAGACAGCCATCTGCAGCATTACATGGTATT  
>C5\_13\_R  
GTCTCGTGGGCTCGGAGATGTGTATAAGAGACAGACAGGTTACGTGTA CTTGCTGAAGA  
>C5\_14\_1\_F  
TCGTCGGCAGCGTCAGATGTGTATAAGAGACAGGTCTTGCTGGTCCTGTTTCGTG  
>C5\_14\_1\_R  
GTCTCGTGGGCTCGGAGATGTGTATAAGAGACAGGGCCACCAGGTCTTTCATTTG  
>C5\_15\_F  
TCGTCGGCAGCGTCAGATGTGTATAAGAGACAGCTACAGGACACCAGCACCGTCTC  
>C5\_15\_R  
GTCTCGTGGGCTCGGAGATGTGTATAAGAGACAGGCAGCCCATCCACCTACTGG  
>C5\_16\_F  
TCGTCGGCAGCGTCAGATGTGTATAAGAGACAGTGCTTAGGTCCCTGATATATTGCAG  
>C5\_16\_R  
GTCTCGTGGGCTCGGAGATGTGTATAAGAGACAGAATGCAGCACTTCCAATGTTTCGTA  
>C5\_17\_F  
TCGTCGGCAGCGTCAGATGTGTATAAGAGACAGCGATCTTCAAAGAAAATGGCGAACC  
>C5\_17\_R  
GTCTCGTGGGCTCGGAGATGTGTATAAGAGACAGGGTTAGTGATCCTATGAAGATATTGTCCAC  
>C5\_18\_F  
TCGTCGGCAGCGTCAGATGTGTATAAGAGACAGCCACAGGTACCTTAACGATTTTAGC  
>C5\_18\_R  
GTCTCGTGGGCTCGGAGATGTGTATAAGAGACAGAATACAGCCCAAACGTGAGATGGAT  
>C5\_19\_F  
TCGTCGGCAGCGTCAGATGTGTATAAGAGACAGTGCTTGTGGAATATCAGTAGCTGGA  
>C5\_19\_R  
GTCTCGTGGGCTCGGAGATGTGTATAAGAGACAGTGTGATACTGTTGTTAAGAGTGTGAGG  
>C5\_20\_F  
TCGTCGGCAGCGTCAGATGTGTATAAGAGACAGATACCCAGTTTGTTCTTCTAGTTGG  
>C5\_20\_R  
GTCTCGTGGGCTCGGAGATGTGTATAAGAGACAGCCAGGACCATCTTTATTTTCATTCTTGAC  
>C5\_21\_F  
TCGTCGGCAGCGTCAGATGTGTATAAGAGACAGCAGGTTCTGAAGACGCGTTTAAGAA  
>C5\_21\_R  
GTCTCGTGGGCTCGGAGATGTGTATAAGAGACAGCATCACCAAACTATACTCGTGCCC  
>C5\_22\_F  
TCGTCGGCAGCGTCAGATGTGTATAAGAGACAGTGAGTTTCTGGACACAAGATGGAGT  
>C5\_22\_R  
GTCTCGTGGGCTCGGAGATGTGTATAAGAGACAGGACTTAAGAAGAACCTTTCCACCG  
>C5\_23\_F  
TCGTCGGCAGCGTCAGATGTGTATAAGAGACAGTCCTCAACTTTTGGATCTGCAGGAT

>C5\_23\_R  
GTCTCGTGGGCTCGGAGATGTGTATAAGAGACAGCTGGCATTACAAACTTGGTAAGCT  
>C6\_1\_F  
TCGTCGGCAGCGTCAGATGTGTATAAGAGACAGTTCCAGGCAGTGCTAATTTTGTGT  
>C6\_1\_R  
GTCTCGTGGGCTCGGAGATGTGTATAAGAGACAGAGTATTTAGAGTCTCCCCATCACCC  
>C6\_2\_F  
TCGTCGGCAGCGTCAGATGTGTATAAGAGACAGAGTTGCGGCATCCCATAAATAGATG  
>C6\_2\_R  
GTCTCGTGGGCTCGGAGATGTGTATAAGAGACAGAACTGGAGCACTTACTCGGTAATGA  
>C6\_3\_F  
TCGTCGGCAGCGTCAGATGTGTATAAGAGACAGGTTAGTACAACTACAAAGGTGAGGTTGTG  
>C6\_3\_R  
GTCTCGTGGGCTCGGAGATGTGTATAAGAGACAGCCACACCAAATCTTACCCAAAATGC  
>C6\_4\_F  
TCGTCGGCAGCGTCAGATGTGTATAAGAGACAGGTCATCGTTGGGAGAACTGGAGA  
>C6\_4\_R  
GTCTCGTGGGCTCGGAGATGTGTATAAGAGACAGGTGGCATTGTTATTGTCCTAAATCTCG  
>C6\_5\_F  
TCGTCGGCAGCGTCAGATGTGTATAAGAGACAGGCTGTTGTACCATGGTTAAACAAGG  
>C6\_5\_R  
GTCTCGTGGGCTCGGAGATGTGTATAAGAGACAGTCCACCTCCAACCACTGTAAAAAGA  
>C6\_6\_F  
TCGTCGGCAGCGTCAGATGTGTATAAGAGACAGCCAACTCTTGCAGTTAGCTCCATT  
>C6\_6\_R  
GTCTCGTGGGCTCGGAGATGTGTATAAGAGACAGGGATGTGAATCGTCGCTGTTTAGC  
>C6\_7\_F  
TCGTCGGCAGCGTCAGATGTGTATAAGAGACAGGAAGGGACAATACGTCTTGCTGC  
>C6\_7\_R  
GTCTCGTGGGCTCGGAGATGTGTATAAGAGACAGAAGATGTCACTTGCCAAAGCTAAGG  
>C6\_8\_F  
TCGTCGGCAGCGTCAGATGTGTATAAGAGACAGTCCGAGGTTGCCTGTAAATAGAACA  
>C6\_8\_R  
GTCTCGTGGGCTCGGAGATGTGTATAAGAGACAGGAGTATCACTTTCTGCTACTTCCAAGT  
>C6\_9\_F  
TCGTCGGCAGCGTCAGATGTGTATAAGAGACAGTCCCTTCTCTTTTAGGCTCTTATTGGA  
>C6\_9\_R  
GTCTCGTGGGCTCGGAGATGTGTATAAGAGACAGTGCAAATGGTGGAAGAACTACTCAA  
>C6\_10\_F  
TCGTCGGCAGCGTCAGATGTGTATAAGAGACAGGTTGTCTTTGGGTTATCATGCCTTT  
>C6\_10\_R  
GTCTCGTGGGCTCGGAGATGTGTATAAGAGACAGGTTTCCTGCTTTAATATCGCGGTGA  
>C6\_11\_F  
TCGTCGGCAGCGTCAGATGTGTATAAGAGACAGGAGCTCAAGTACAAGTCAACATTCTTC  
>C6\_11\_R  
GTCTCGTGGGCTCGGAGATGTGTATAAGAGACAGCTGATTGAAATCCAGCTGTCAATTGAG  
>C6\_12\_F  
TCGTCGGCAGCGTCAGATGTGTATAAGAGACAGCCGATTCCAAGATGATTGATGAGCC  
>C6\_12\_R  
GTCTCGTGGGCTCGGAGATGTGTATAAGAGACAGGGATCAGGACAGAAGAATCTACTTGGT  
>C6\_13\_F  
TCGTCGGCAGCGTCAGATGTGTATAAGAGACAGTTGGCTCCCTATACATACCAGATGC  
>C6\_13\_R  
GTCTCGTGGGCTCGGAGATGTGTATAAGAGACAGCTCTCTTTACTCTGTGTTGTAGCTGC  
>C6\_14\_F  
TCGTCGGCAGCGTCAGATGTGTATAAGAGACAGCCCAGAATCTAGAGATGGAGCGTAG  
>C6\_14\_R

GTCTCGTGGGCTCGGAGATGTGTATAAGAGACAGAGAATTCCAGCCTGATGTAAAGGT  
>C6\_15\_F  
TCGTCGGCAGCGTCAGATGTGTATAAGAGACAGTGGGTTTATTCATTTTCTTGGTGGAGG  
>C6\_15\_R  
GTCTCGTGGGCTCGGAGATGTGTATAAGAGACAGCCTTTTGTGCTTATGCCTGTAAAGT  
>C6\_16\_F  
TCGTCGGCAGCGTCAGATGTGTATAAGAGACAGGCAGTGTCTGGATTAACCTGCA  
>C6\_16\_R  
GTCTCGTGGGCTCGGAGATGTGTATAAGAGACAGCTCAAGGGATTGCTTGGTATTGAGG  
>C6\_17\_F  
TCGTCGGCAGCGTCAGATGTGTATAAGAGACAGTGTCTTACTCACTTCCTTTTCCACA  
>C6\_17\_R  
GTCTCGTGGGCTCGGAGATGTGTATAAGAGACAGGACTAACATTGAGTTTTTCCATCCACAGC  
>C6\_18\_F  
TCGTCGGCAGCGTCAGATGTGTATAAGAGACAGTGTGGTCCTGAAGCTGTTGGTT  
>C6\_18\_R  
GTCTCGTGGGCTCGGAGATGTGTATAAGAGACAGAGTTGATGGGAATGTTCTTTCCAA  
>C6\_19\_F  
TCGTCGGCAGCGTCAGATGTGTATAAGAGACAGATGAAGATTGGCTCCATTTGACTGC  
>C6\_19\_R  
GTCTCGTGGGCTCGGAGATGTGTATAAGAGACAGTGGAGTTTGAAGAGGGTGATGTGAA  
>C6\_20\_F  
TCGTCGGCAGCGTCAGATGTGTATAAGAGACAGGGAGGCTTAGCTACCTGGTGTA  
>C6\_20\_R  
GTCTCGTGGGCTCGGAGATGTGTATAAGAGACAGGTGCAAAGCTTGATGAATAGGGAGC  
>C6\_21\_F  
TCGTCGGCAGCGTCAGATGTGTATAAGAGACAGGAGTCACCGCTGTTCCAGAATC  
>C6\_21\_R  
GTCTCGTGGGCTCGGAGATGTGTATAAGAGACAGGACCTAGTGA CTGGTGTTCAC  
>C6\_22\_F  
TCGTCGGCAGCGTCAGATGTGTATAAGAGACAGGGTCTCAGAAGATGGGTCACCG  
>C6\_22\_R  
GTCTCGTGGGCTCGGAGATGTGTATAAGAGACAGGCACGCTCACATTCAAGCTTAATTG  
>C6\_23\_F  
TCGTCGGCAGCGTCAGATGTGTATAAGAGACAGTTTGAGTGAAACAAAGTGGTCTGC  
>C6\_23\_R  
GTCTCGTGGGCTCGGAGATGTGTATAAGAGACAGAACTGGTGTCCAATCCCAGGTATC  
>C6\_24\_F  
TCGTCGGCAGCGTCAGATGTGTATAAGAGACAGCCAGTGCTTCCTTAGTCCAGCTAA  
>C6\_24\_R  
GTCTCGTGGGCTCGGAGATGTGTATAAGAGACAGGTGCGCTCCCACTTAGCAAAATG  
>C6\_25\_F  
TCGTCGGCAGCGTCAGATGTGTATAAGAGACAGGGTTACTTGAAAGAAGTATCAGAGCGG  
>C6\_25\_R  
GTCTCGTGGGCTCGGAGATGTGTATAAGAGACAGACAAGATCAGAATCTAGTGCCTGCT  
>C6\_26\_F  
TCGTCGGCAGCGTCAGATGTGTATAAGAGACAGCAGCAAGTGACAAAATTCTTCTTTACC  
>C6\_26\_R  
GTCTCGTGGGCTCGGAGATGTGTATAAGAGACAGTGCGCAAATATGTTAAGGTCACTGT  
>C6\_27\_F  
TCGTCGGCAGCGTCAGATGTGTATAAGAGACAGAATCCGAAATCACCTCCGATCAATT  
>C6\_27\_R  
GTCTCGTGGGCTCGGAGATGTGTATAAGAGACAGGGAAAATGATCCGAACTATATTGTTACCGG  
>C6\_28\_F  
TCGTCGGCAGCGTCAGATGTGTATAAGAGACAGATGGGATCCCTTTGGTAACTCAACA  
>C6\_28\_R  
GTCTCGTGGGCTCGGAGATGTGTATAAGAGACAGTGCTAAGGCAATTGGATGTACTCTAGT

>C6\_29\_F  
TCGTCGGCAGCGTCAGATGTGTATAAGAGACAGGGAGGAAGCAGCATTCTCTGGTATT  
>C6\_29\_R  
GTCTCGTGGGCTCGGAGATGTGTATAAGAGACAGCTCCAAGAACTATTTTCACATCCAGCT  
>C7\_1\_F  
TCGTCGGCAGCGTCAGATGTGTATAAGAGACAGTTGCCAGTTTCTGCAATGAAGCATA  
>C7\_1\_R  
GTCTCGTGGGCTCGGAGATGTGTATAAGAGACAGTAACAAGGGAAAAGCCAAAAGGACG  
>C7\_2\_F  
TCGTCGGCAGCGTCAGATGTGTATAAGAGACAGAACTACTCAATCCAGCAACTGCAC  
>C7\_2\_R  
GTCTCGTGGGCTCGGAGATGTGTATAAGAGACAGCCAAATACCTTTGCTAATCTTCCGCA  
>C7\_3\_F  
TCGTCGGCAGCGTCAGATGTGTATAAGAGACAGAGCTGGGATTGACTAGTCCT  
>C7\_3\_R  
GTCTCGTGGGCTCGGAGATGTGTATAAGAGACAGTCTTGAACCTGTCAACATTTGCT  
>C7\_4\_F  
TCGTCGGCAGCGTCAGATGTGTATAAGAGACAGATCATGTATGGTTCTGACCTCCCTC  
>C7\_4\_R  
GTCTCGTGGGCTCGGAGATGTGTATAAGAGACAGACCCAGTCATTCACTACAATTGAGC  
>C7\_5\_F  
TCGTCGGCAGCGTCAGATGTGTATAAGAGACAGTCATTAGCCTGGAATAACAGTGCAT  
>C7\_5\_R  
GTCTCGTGGGCTCGGAGATGTGTATAAGAGACAGTGGTCGAGGAATTAATGTTTGATGGTC  
>C7\_6\_F  
TCGTCGGCAGCGTCAGATGTGTATAAGAGACAGCGGATGGAATCTCCTTGTTGTTGT  
>C7\_6\_R  
GTCTCGTGGGCTCGGAGATGTGTATAAGAGACAGGCCCATATAGCCATGGTTGATCTTG  
>C7\_7\_F  
TCGTCGGCAGCGTCAGATGTGTATAAGAGACAGACACACATCTAACGAACACTCCCT  
>C7\_7\_R  
GTCTCGTGGGCTCGGAGATGTGTATAAGAGACAGGTCTCTCAGACTTGGTTGTCCCTTAC  
>C7\_8\_F  
TCGTCGGCAGCGTCAGATGTGTATAAGAGACAGTTCAAGTCAACCGTATTCTCCAGCT  
>C7\_8\_R  
GTCTCGTGGGCTCGGAGATGTGTATAAGAGACAGACTCTTCACTGTCTTTTCCCCTTGT  
>C7\_9\_F  
TCGTCGGCAGCGTCAGATGTGTATAAGAGACAGACCCTGAAATCATTGCATTCCAAGT  
>C7\_9\_R  
GTCTCGTGGGCTCGGAGATGTGTATAAGAGACAGGAAAGTGGGTGGAGGAGTATGTTGT  
>C7\_10\_F  
TCGTCGGCAGCGTCAGATGTGTATAAGAGACAGTTACCCACATGTATTGACTTCGCTG  
>C7\_10\_R  
GTCTCGTGGGCTCGGAGATGTGTATAAGAGACAGCTCTTCCCTTCTGATTTTCATGGC  
>C7\_11\_F  
TCGTCGGCAGCGTCAGATGTGTATAAGAGACAGACACCCTGACCATGTAAGTGTGTT  
>C7\_11\_R  
GTCTCGTGGGCTCGGAGATGTGTATAAGAGACAGTCATTTTCCCCCAAATTCTCCTTCA  
>C7\_12\_F  
TCGTCGGCAGCGTCAGATGTGTATAAGAGACAGAAATTCAGAGGCTGCAATCATTCAGG  
>C7\_12\_R  
GTCTCGTGGGCTCGGAGATGTGTATAAGAGACAGAGGTCTAGAGATGTCACACTCTCCA  
>C7\_13\_F  
TCGTCGGCAGCGTCAGATGTGTATAAGAGACAGTTGAAGTTGGAATGGCATGTGGAAG  
>C7\_13\_R  
GTCTCGTGGGCTCGGAGATGTGTATAAGAGACAGACAACAGAAACAACATCTTGCTCAC  
>C7\_14\_F

TCGTCGGCAGCGTCAGATGTGTATAAGAGACAGCCAAGAACTAACTTCCTGGAACTGT  
>C7\_14\_R  
GTCTCGTGGGCTCGGAGATGTGTATAAGAGACAGGGGGTGGTCAAATAATCAACTGAAC  
>C7\_15\_F  
TCGTCGGCAGCGTCAGATGTGTATAAGAGACAGCCGTGAAAGAAGATTCAACCGTCTT  
>C7\_15\_R  
GTCTCGTGGGCTCGGAGATGTGTATAAGAGACAGCCAGAACTCGAAGCTGCAAATACA  
>C7\_16\_F  
TCGTCGGCAGCGTCAGATGTGTATAAGAGACAGAAATGTCGAGAGGTGTGCTTCTACC  
>C7\_16\_R  
GTCTCGTGGGCTCGGAGATGTGTATAAGAGACAGAAGGGAAAGGGAAATTTGCTTGCAT  
>C7\_17\_F  
TCGTCGGCAGCGTCAGATGTGTATAAGAGACAGCTACTATTCATGCTTCCAACCAACC  
>C7\_17\_R  
GTCTCGTGGGCTCGGAGATGTGTATAAGAGACAGGATCCTTCCAACAAGAGCTCATTGT  
>C7\_18\_F  
TCGTCGGCAGCGTCAGATGTGTATAAGAGACAGATGGAGTAACTTATATCCTGCAGAGTC  
>C7\_18\_R  
GTCTCGTGGGCTCGGAGATGTGTATAAGAGACAGGCATGCTGACGAAGACTTGTTCAA  
>C7\_19\_F  
TCGTCGGCAGCGTCAGATGTGTATAAGAGACAGGGCAGAAGTCTGTAGATCAAATGGC  
>C7\_19\_R  
GTCTCGTGGGCTCGGAGATGTGTATAAGAGACAGGGTGAAGGATGCACTACTACGTCAT  
>C7\_20\_F  
TCGTCGGCAGCGTCAGATGTGTATAAGAGACAGAGTATACCTCCTAATGTGGCACTGC  
>C7\_20\_R  
GTCTCGTGGGCTCGGAGATGTGTATAAGAGACAGGTTTTGTCATTGGTCACGGGTAGG  
>C7\_21\_F  
TCGTCGGCAGCGTCAGATGTGTATAAGAGACAGCAAGCATAGTTCAGAGACTGATTGGA  
>C7\_21\_R  
GTCTCGTGGGCTCGGAGATGTGTATAAGAGACAGGATCTGCATTCTTCAGCACTCCAG  
>C7\_22\_F  
TCGTCGGCAGCGTCAGATGTGTATAAGAGACAGAATGATGATGATGAGCAGATTGGGG  
>C7\_22\_R  
GTCTCGTGGGCTCGGAGATGTGTATAAGAGACAGAAGCCAAAGACGAGTCTATTACGA  
>C7\_23\_F  
TCGTCGGCAGCGTCAGATGTGTATAAGAGACAGTCAACTTGCACTATCTCTCCTCCTC  
>C7\_23\_R  
GTCTCGTGGGCTCGGAGATGTGTATAAGAGACAGGCAGCACTAGCAGAGTTAATTTTCA  
>C7\_24\_F  
TCGTCGGCAGCGTCAGATGTGTATAAGAGACAGTATCGAGGCTACATTTGAGGACCAA  
>C7\_24\_R  
GTCTCGTGGGCTCGGAGATGTGTATAAGAGACAGTGATTGGTTGTGGGAAATGAACTGG  
>C7\_25\_F  
TCGTCGGCAGCGTCAGATGTGTATAAGAGACAGGACCATAGTGACATTATTTGGTGTCT  
>C7\_25\_R  
GTCTCGTGGGCTCGGAGATGTGTATAAGAGACAGAGTGGAGCAGTAGAATTTTCTAGCCA  
>C7\_26\_F  
TCGTCGGCAGCGTCAGATGTGTATAAGAGACAGAAATCAATTCTTAGTCCTGGCCGTG  
>C7\_26\_R  
GTCTCGTGGGCTCGGAGATGTGTATAAGAGACAGGGAGAAGTAGGTTCCGGGTTTTCAA  
>C7\_27\_F  
TCGTCGGCAGCGTCAGATGTGTATAAGAGACAGACATCTTCTTCTCCTTGAACGCA  
>C7\_27\_R  
GTCTCGTGGGCTCGGAGATGTGTATAAGAGACAGTTTTACAGGGTGTGTTAGAAGGGGG  
>C7\_28\_F  
TCGTCGGCAGCGTCAGATGTGTATAAGAGACAGGCAAGACTAGATGTATCATTAGATGATCCC

>C7\_28\_R  
GTCTCGTGGGCTCGGAGATGTGTATAAGAGACAGTGGCGCTAGTCTAGTATCTCTCTCA  
>C7\_29\_F  
TCGTCGGCAGCGTCAGATGTGTATAAGAGACAGACAGACCGTCATTGATTAAACCCCT  
>C7\_29\_R  
GTCTCGTGGGCTCGGAGATGTGTATAAGAGACAGGTGCTACACTTAACTTGCTAAAGGGT  
>C7\_30\_F  
TCGTCGGCAGCGTCAGATGTGTATAAGAGACAGGTAACCTCTTCATGTTTGCCACCTC  
>C7\_30\_R  
GTCTCGTGGGCTCGGAGATGTGTATAAGAGACAGATCATCTGCTGGATTGAAGTTGCAG  
>C8\_1\_F  
TCGTCGGCAGCGTCAGATGTGTATAAGAGACAGTGAGGCTTCTAGATTTCTTTGCTCTGT  
>C8\_1\_R  
GTCTCGTGGGCTCGGAGATGTGTATAAGAGACAGAGCACTAATAGTCTGTGTAGCCAGC  
>C8\_2\_F  
TCGTCGGCAGCGTCAGATGTGTATAAGAGACAGTTAGCGACCGCCACCCGAAA  
>C8\_2\_R  
GTCTCGTGGGCTCGGAGATGTGTATAAGAGACAGCTTGACATCAAACCCCATGGATTGG  
>C8\_3\_F  
TCGTCGGCAGCGTCAGATGTGTATAAGAGACAGAGGCAATGGTTCTAGTCTCCACAAT  
>C8\_3\_R  
GTCTCGTGGGCTCGGAGATGTGTATAAGAGACAGGTAGTGGGAAAGGAGTTTGACATC  
>C8\_4\_F  
TCGTCGGCAGCGTCAGATGTGTATAAGAGACAGGGAAATCTCAGAAGATGAAGGTTATGC  
>C8\_4\_R  
GTCTCGTGGGCTCGGAGATGTGTATAAGAGACAGCAACAGCTCTACCAGTGTTGTTGTT  
>C8\_5\_F  
TCGTCGGCAGCGTCAGATGTGTATAAGAGACAGTGGTGGAGTTTTCTGTTTCGTTGTT  
>C8\_5\_R  
GTCTCGTGGGCTCGGAGATGTGTATAAGAGACAGGGCAGATACTCTCCTGTTCTTGCTT  
>C8\_6\_F  
TCGTCGGCAGCGTCAGATGTGTATAAGAGACAGTATTTTCACGCGAAACTCAAAGGCT  
>C8\_6\_R  
GTCTCGTGGGCTCGGAGATGTGTATAAGAGACAGAGCTTTCTCTGTGTACTTGTAGGCA  
>C8\_7\_F  
TCGTCGGCAGCGTCAGATGTGTATAAGAGACAGCAGATGAGCAACATTTTTGCTCTCT  
>C8\_7\_R  
GTCTCGTGGGCTCGGAGATGTGTATAAGAGACAGAGTGGACTCCTAGAGTACTGCATTG  
>C8\_8\_F  
TCGTCGGCAGCGTCAGATGTGTATAAGAGACAGCCAACCCAACTACCATAACCCAAAG  
>C8\_8\_R  
GTCTCGTGGGCTCGGAGATGTGTATAAGAGACAGTACACCACATATTTCTCAGGGTGCA  
>C8\_9\_F  
TCGTCGGCAGCGTCAGATGTGTATAAGAGACAGTAGCTTTAATGCGGTCACTTTTCCT  
>C8\_9\_R  
GTCTCGTGGGCTCGGAGATGTGTATAAGAGACAGGGCCCCGGATAACCATATGAATTTG  
>C8\_10\_F  
TCGTCGGCAGCGTCAGATGTGTATAAGAGACAGGCTCCACTTTCCATTTTCTGTAGTCC  
>C8\_10\_R  
GTCTCGTGGGCTCGGAGATGTGTATAAGAGACAGACGTCTTGACATCCTCCCCAAACT  
>C8\_11\_F  
TCGTCGGCAGCGTCAGATGTGTATAAGAGACAGTGATACGAAAACCAGAGGGAAGGAG  
>C8\_11\_R  
GTCTCGTGGGCTCGGAGATGTGTATAAGAGACAGCCCTTTGTGTTATACTTTCTGCCACC  
>C8\_12\_F  
TCGTCGGCAGCGTCAGATGTGTATAAGAGACAGTTTGGTTATGGACTGCTCTGGAGAA  
>C8\_12\_R

GTCTCGTGGGCTCGGAGATGTGTATAAGAGACAGGTGATGCGTGGCAAGACAATGG  
>C8\_13\_F  
TCGTCGGCAGCGTCAGATGTGTATAAGAGACAGAGGTATGTCATAGCCAGGAAGATGA  
>C8\_13\_R  
GTCTCGTGGGCTCGGAGATGTGTATAAGAGACAGACACCAGTAGTTGCAATGGTAACTT  
>C8\_14\_F  
TCGTCGGCAGCGTCAGATGTGTATAAGAGACAGTCTTCATTGCTCTCATGTTTGAAC  
>C8\_14\_R  
GTCTCGTGGGCTCGGAGATGTGTATAAGAGACAGATCTTGTTCCTTCTCCTGAAATTGG  
>C8\_15\_F  
TCGTCGGCAGCGTCAGATGTGTATAAGAGACAGGATGTGTCTGATTGGAATCAACCCA  
>C8\_15\_R  
GTCTCGTGGGCTCGGAGATGTGTATAAGAGACAGAATGCTTCTTATTAGACCTCCCAGG  
>C8\_16\_F  
TCGTCGGCAGCGTCAGATGTGTATAAGAGACAGAGAACAAGTAGCCAAGATCGCATTT  
>C8\_16\_R  
GTCTCGTGGGCTCGGAGATGTGTATAAGAGACAGGCATCAAATGTGCAGGACTTCATCC  
>C8\_17\_F  
TCGTCGGCAGCGTCAGATGTGTATAAGAGACAGTGGAGATAACTGATCAGGTGAGTTAGA  
>C8\_17\_R  
GTCTCGTGGGCTCGGAGATGTGTATAAGAGACAGGCTACTAAGCTTCCATGAAGAGAGAGT  
>C8\_18\_F  
TCGTCGGCAGCGTCAGATGTGTATAAGAGACAGTAATGCTCCTTGTCGGTCCCAATTC  
>C8\_18\_R  
GTCTCGTGGGCTCGGAGATGTGTATAAGAGACAGCCGGCTGAATAGAAATTACCCATGT  
>C8\_19\_F  
TCGTCGGCAGCGTCAGATGTGTATAAGAGACAGCGATCCCTGAGAAGGAGAGAGGA  
>C8\_19\_R  
GTCTCGTGGGCTCGGAGATGTGTATAAGAGACAGCATGCAGCAAGACAATAAATGGTACTTCAC  
>C8\_20\_F  
TCGTCGGCAGCGTCAGATGTGTATAAGAGACAGACATCCCATCAACATTGCATTCCAG  
>C8\_20\_R  
GTCTCGTGGGCTCGGAGATGTGTATAAGAGACAGGTGGTCAACAGGTTTCATGCTACTTC  
>C8\_21\_F  
TCGTCGGCAGCGTCAGATGTGTATAAGAGACAGTCTTCTTGAGAGTGGTTGTGCTTTT  
>C8\_21\_R  
GTCTCGTGGGCTCGGAGATGTGTATAAGAGACAGAGTACACAAGGTTGGTGCACG  
>C8\_22\_F  
TCGTCGGCAGCGTCAGATGTGTATAAGAGACAGGTTTGGCCTGTTTGTCTCAAGGAC  
>C8\_22\_R  
GTCTCGTGGGCTCGGAGATGTGTATAAGAGACAGCTGAGCAACCTCCCTCGCAA  
>C8\_23\_F  
TCGTCGGCAGCGTCAGATGTGTATAAGAGACAGATTCACATAAATGCCATTACCCGCC  
>C8\_23\_R  
GTCTCGTGGGCTCGGAGATGTGTATAAGAGACAGGCCACATTCAACAACCCCTTTACTA  
>C8\_24\_F  
TCGTCGGCAGCGTCAGATGTGTATAAGAGACAGCAGAGTTGGGAGGCATTGAAGTTTT  
>C8\_24\_R  
GTCTCGTGGGCTCGGAGATGTGTATAAGAGACAGTGAACTATGTGCTGCATCCAAGTG  
>C8\_25\_F  
TCGTCGGCAGCGTCAGATGTGTATAAGAGACAGAGGAGTAATATTGTCGGTGAGAAGGG  
>C8\_25\_R  
GTCTCGTGGGCTCGGAGATGTGTATAAGAGACAGACCTTTTGAACATCACAGTTCTTGG  
>C8\_26\_F  
TCGTCGGCAGCGTCAGATGTGTATAAGAGACAGTGAACTGTGAGAGTCTTGAAGGA  
>C8\_26\_R  
GTCTCGTGGGCTCGGAGATGTGTATAAGAGACAGCCAAGATCCAAAAGCTCCAACCTTT

>C8\_27\_F  
TCGTCGGCAGCGTCAGATGTGTATAAGAGACAGAAGTTGATACTCCTTGTACCTGCCC  
>C8\_27\_R  
GTCTCGTGGGCTCGGAGATGTGTATAAGAGACAGTCTTGCTCAGTCTCACTTTGGTTCT  
>C8\_28\_F  
TCGTCGGCAGCGTCAGATGTGTATAAGAGACAGTCCTTCCTGAAATACGTCCAATCCA  
>C8\_28\_R  
GTCTCGTGGGCTCGGAGATGTGTATAAGAGACAGAGGACCCTGAATACAGAAATGGGAA  
>C8\_29\_F  
TCGTCGGCAGCGTCAGATGTGTATAAGAGACAGAATGATGGAGACTACACTGACCAGC  
>C8\_29\_R  
GTCTCGTGGGCTCGGAGATGTGTATAAGAGACAGCACAGAGTCAAACCTTGAACCAAGT  
>C8\_30\_F  
TCGTCGGCAGCGTCAGATGTGTATAAGAGACAGAAGCCTGGTGGTGGTAAAGCC  
>C8\_30\_R  
GTCTCGTGGGCTCGGAGATGTGTATAAGAGACAGCTTTGGAACCCAAGGCCGG  
>C9\_1\_F  
TCGTCGGCAGCGTCAGATGTGTATAAGAGACAGAAGTTGGTCCCCTCGCTCATCTTT  
>C9\_1\_R  
GTCTCGTGGGCTCGGAGATGTGTATAAGAGACAGGGCCATGAAGCAATAACTCCTCATG  
>C9\_2\_F  
TCGTCGGCAGCGTCAGATGTGTATAAGAGACAGCCTTCACTAAAAGAAATGGAAGTAGCC  
>C9\_2\_R  
GTCTCGTGGGCTCGGAGATGTGTATAAGAGACAGACAAAGGCACTATTTCTGGAGTTGC  
>C9\_3\_F  
TCGTCGGCAGCGTCAGATGTGTATAAGAGACAGTGTACGCTGTTTGGTGAATGTTGAT  
>C9\_3\_R  
GTCTCGTGGGCTCGGAGATGTGTATAAGAGACAGCACAAAGCTTGAATGCAGTGAGAAC  
>C9\_4\_F  
TCGTCGGCAGCGTCAGATGTGTATAAGAGACAGAAGGAATTACTGACCTGTGTAGCAG  
>C9\_4\_R  
GTCTCGTGGGCTCGGAGATGTGTATAAGAGACAGTATACAAGGAATGCATGGGATGGGA  
>C9\_5\_F  
TCGTCGGCAGCGTCAGATGTGTATAAGAGACAGGGTGTATTATTCTGTTACGATCCTGA  
>C9\_5\_R  
GTCTCGTGGGCTCGGAGATGTGTATAAGAGACAGCATTACGCGACACCAATACCAAGA  
>C9\_6\_F  
TCGTCGGCAGCGTCAGATGTGTATAAGAGACAGGCTGCGTCAGGTAATCGGAGTTC  
>C9\_6\_R  
GTCTCGTGGGCTCGGAGATGTGTATAAGAGACAGACATTGGAAGTGCCTCAATTGTTCC  
>C9\_7\_1\_F  
TCGTCGGCAGCGTCAGATGTGTATAAGAGACAGTTTACGAACTCATGCCTCATGGAAC  
>C9\_7\_1\_R  
GTCTCGTGGGCTCGGAGATGTGTATAAGAGACAGTTGAACTCTTACATCACGGTGCAC  
>C9\_8\_F  
TCGTCGGCAGCGTCAGATGTGTATAAGAGACAGTCATCTAGCATGTCAACTAGGCACA  
>C9\_8\_R  
GTCTCGTGGGCTCGGAGATGTGTATAAGAGACAGGCATATGCTCGACACAATCCAGATG  
>C9\_9\_F  
TCGTCGGCAGCGTCAGATGTGTATAAGAGACAGCAAACGCATAGCCTGTAATCAAAGA  
>C9\_9\_R  
GTCTCGTGGGCTCGGAGATGTGTATAAGAGACAGCTTCATTTTCATCTTTCCACAGCCT  
>C9\_10\_F  
TCGTCGGCAGCGTCAGATGTGTATAAGAGACAGTCCCGAACTATTTGGTCTTGACTGT  
>C9\_10\_R  
GTCTCGTGGGCTCGGAGATGTGTATAAGAGACAGGGTTGAAGCTCATTCCCAAGATTCT  
>C9\_11\_F

TCGTCGGCAGCGTCAGATGTGTATAAGAGACAGATGTTAGTGGTTTGTGGGAAGGCAT  
>C9\_11\_R  
GTCTCGTGGGCTCGGAGATGTGTATAAGAGACAGGATCCTCCAACAGAGTGCATTTCTG  
>C9\_12\_F  
TCGTCGGCAGCGTCAGATGTGTATAAGAGACAGCTCTAGTGGTTAGAAGAGGACGTGC  
>C9\_12\_R  
GTCTCGTGGGCTCGGAGATGTGTATAAGAGACAGTGTGCTCCTGAATATGCAATGACG  
>C9\_13\_F  
TCGTCGGCAGCGTCAGATGTGTATAAGAGACAGGGTCCCATCCGAATACTGTCCAAA  
>C9\_13\_R  
GTCTCGTGGGCTCGGAGATGTGTATAAGAGACAGTGTCTGGCTTGTTCGTGTTCTTATG  
>C9\_14\_F  
TCGTCGGCAGCGTCAGATGTGTATAAGAGACAGAACAGTCATCGATTTCAAATCCGCT  
>C9\_14\_R  
GTCTCGTGGGCTCGGAGATGTGTATAAGAGACAGACTTTATCCTTCCCGTTTCTCCGC  
>C9\_15\_1\_F  
TCGTCGGCAGCGTCAGATGTGTATAAGAGACAGGTACAAGTGAAAGCATTCTTAATCCCC  
>C9\_15\_1\_R  
GTCTCGTGGGCTCGGAGATGTGTATAAGAGACAGCACATGCTGTTGTGCTTGCTCTAA  
>C9\_16\_F  
TCGTCGGCAGCGTCAGATGTGTATAAGAGACAGACAAGTTCACCATATCAACACCAGC  
>C9\_16\_R  
GTCTCGTGGGCTCGGAGATGTGTATAAGAGACAGTTTTGGAAGCTAATATGGCGACCAC  
>C9\_17\_F  
TCGTCGGCAGCGTCAGATGTGTATAAGAGACAGGGAATGTCAATGTAATAATCGTCTGC  
>C9\_17\_R  
GTCTCGTGGGCTCGGAGATGTGTATAAGAGACAGCCTGTTAACACCACCAGTTCGG  
>C9\_18\_F  
TCGTCGGCAGCGTCAGATGTGTATAAGAGACAGGGGTGGTATCAAGAGTAGAGGTTTGT  
>C9\_18\_R  
GTCTCGTGGGCTCGGAGATGTGTATAAGAGACAGTGCTTATCGAGATAGGTACCCAGA  
>C9\_19\_F  
TCGTCGGCAGCGTCAGATGTGTATAAGAGACAGCCAGAGGCAGCAGAAATCGTTCT  
>C9\_19\_R  
GTCTCGTGGGCTCGGAGATGTGTATAAGAGACAGGTTAGCTATGGGATGTCTCTACCC  
>C9\_20\_F  
TCGTCGGCAGCGTCAGATGTGTATAAGAGACAGTGTCTCTCTCCTTCATCAGCTTCT  
>C9\_20\_R  
GTCTCGTGGGCTCGGAGATGTGTATAAGAGACAGCAATTCCTTCACTATCCGAAGAGCC  
>C9\_21\_F  
TCGTCGGCAGCGTCAGATGTGTATAAGAGACAGGTCAGATAACCTCCTGGAAAATAACATCC  
>C9\_21\_R  
GTCTCGTGGGCTCGGAGATGTGTATAAGAGACAGCACCAAACTATCACAAACCAATCACC  
>C9\_22\_F  
TCGTCGGCAGCGTCAGATGTGTATAAGAGACAGTATAACAGGTGATGTGTGGGGGC  
>C9\_22\_R  
GTCTCGTGGGCTCGGAGATGTGTATAAGAGACAGCGCCTAGCACATCCTATGAACTTTT  
>C9\_23\_F  
TCGTCGGCAGCGTCAGATGTGTATAAGAGACAGTGGCGGACTCATCTTAAATTCCTG  
>C9\_23\_R  
GTCTCGTGGGCTCGGAGATGTGTATAAGAGACAGTTCAATCCCATTCCATGTGTTACG  
>C9\_24\_F  
TCGTCGGCAGCGTCAGATGTGTATAAGAGACAGCTCAAGGTGAGGAGACCAGAACTT  
>C9\_24\_R  
GTCTCGTGGGCTCGGAGATGTGTATAAGAGACAGTCCAGCAGATATGTTTTGATGGCAG  
>C9\_25\_F  
TCGTCGGCAGCGTCAGATGTGTATAAGAGACAGCCACTGTTTTCTCATGCGTGACC

>C9\_25\_R  
GTCTCGTGGGCTCGGAGATGTGTATAAGAGACAGCGGAAATTTCTAGGGAGATGAAGAAGA  
>C9\_26\_F  
TCGTCGGCAGCGTCAGATGTGTATAAGAGACAGCCATTGCAGAAAACATGAGAAGTTTTGAGG  
>C9\_26\_R  
GTCTCGTGGGCTCGGAGATGTGTATAAGAGACAGGCTACTTCACTTTCTGGTTATGTTCC  
>C9\_27\_F  
TCGTCGGCAGCGTCAGATGTGTATAAGAGACAGATGTTATAGGACCTACTTGTGGCGG  
>C9\_27\_R  
GTCTCGTGGGCTCGGAGATGTGTATAAGAGACAGTGCAAGTAAGGGAGTCGAGAAACAT  
>C9\_28\_F  
TCGTCGGCAGCGTCAGATGTGTATAAGAGACAGTGTGATTTAGCCACAAGGTTATGGG  
>C9\_28\_R  
GTCTCGTGGGCTCGGAGATGTGTATAAGAGACAGCCAAATGATACACATTAGAGCAAGAGG  
>C10\_1\_F  
TCGTCGGCAGCGTCAGATGTGTATAAGAGACAGACCAGAAAATTGTAGCAGCTTCTGA  
>C10\_1\_R  
GTCTCGTGGGCTCGGAGATGTGTATAAGAGACAGTGAAGTGCAAATGATGGAGCTCAT  
>C10\_2\_F  
TCGTCGGCAGCGTCAGATGTGTATAAGAGACAGCAAAGGAGCTTCGATCACCTAAACC  
>C10\_2\_R  
GTCTCGTGGGCTCGGAGATGTGTATAAGAGACAGGCGGCTGGACATAAAGATTTGTTCT  
>C10\_3\_F  
TCGTCGGCAGCGTCAGATGTGTATAAGAGACAGTGCTCTTCCCTTCTGAAAATTGT  
>C10\_3\_R  
GTCTCGTGGGCTCGGAGATGTGTATAAGAGACAGCGTATGCATGTAAGACAGCGATCTC  
>C10\_4\_F  
TCGTCGGCAGCGTCAGATGTGTATAAGAGACAGAACCTCTGAAGTGTCTCCAAATAA  
>C10\_4\_R  
GTCTCGTGGGCTCGGAGATGTGTATAAGAGACAGGAAAGCTGGCAGATTTTGTGCTTTG  
>C10\_5\_F  
TCGTCGGCAGCGTCAGATGTGTATAAGAGACAGCTTCACAACAAAGCAATCTCAAGCT  
>C10\_5\_R  
GTCTCGTGGGCTCGGAGATGTGTATAAGAGACAGCAACGGCGGCATCATCTCATG  
>C10\_6\_F  
TCGTCGGCAGCGTCAGATGTGTATAAGAGACAGGGTGGTTAAAAGGTCACAATCAATAGC  
>C10\_6\_R  
GTCTCGTGGGCTCGGAGATGTGTATAAGAGACAGGGATCCATGATTAGAAAGCAAGTGTGA  
>C10\_7\_F  
TCGTCGGCAGCGTCAGATGTGTATAAGAGACAGAATTGGTCAATCCTCTCGCTTTCAC  
>C10\_7\_R  
GTCTCGTGGGCTCGGAGATGTGTATAAGAGACAGACAAATGTCACATTTTCATGGTGGCT  
>C10\_8\_F  
TCGTCGGCAGCGTCAGATGTGTATAAGAGACAGTTCGTGGAAGAAGGTAACATTTGCA  
>C10\_8\_R  
GTCTCGTGGGCTCGGAGATGTGTATAAGAGACAGTGAAGAGCATAGATATCTACGCCGG  
>C10\_9\_F  
TCGTCGGCAGCGTCAGATGTGTATAAGAGACAGATGCCATGGAGAGTACAAAAGGACT  
>C10\_9\_R  
GTCTCGTGGGCTCGGAGATGTGTATAAGAGACAGCGGCCAATAAAAAATCCTCCACTTGA  
>C10\_10\_F  
TCGTCGGCAGCGTCAGATGTGTATAAGAGACAGACATCCGTTGAGTTGTAAAACCAC  
>C10\_10\_R  
GTCTCGTGGGCTCGGAGATGTGTATAAGAGACAGGCTTCGCGAGATAAGTTGGAAACAA  
>C10\_11\_F  
TCGTCGGCAGCGTCAGATGTGTATAAGAGACAGCTGGTTGAACAAGGAAAACAGGGG  
>C10\_11\_R

GTCTCGTGGGCTCGGAGATGTGTATAAGAGACAGGTCAAGATTGGAACCCCTACAAGGTG  
>C10\_12\_F  
TCGTCGGCAGCGTCAGATGTGTATAAGAGACAGGGAAACATGGTATCCTGCGTGAATT  
>C10\_12\_R  
GTCTCGTGGGCTCGGAGATGTGTATAAGAGACAGCTATTACGCCTTCCATTGGTGTGT  
>C10\_13\_F  
TCGTCGGCAGCGTCAGATGTGTATAAGAGACAGTCGGAGAGAAATGAGATTGGTTCCG  
>C10\_13\_R  
GTCTCGTGGGCTCGGAGATGTGTATAAGAGACAGCAATTACTTGCCCATTCGCGAG  
>C10\_14\_F  
TCGTCGGCAGCGTCAGATGTGTATAAGAGACAGCCAGCCTCAAATAGTATGCCATTTCT  
>C10\_14\_R  
GTCTCGTGGGCTCGGAGATGTGTATAAGAGACAGTTGCACGGCTAACTCCTATACAAAT  
>C10\_15\_F  
TCGTCGGCAGCGTCAGATGTGTATAAGAGACAGAGACCGACTAGATGTCTTAAGCACA  
>C10\_15\_R  
GTCTCGTGGGCTCGGAGATGTGTATAAGAGACAGTTCTCAACAGAAAGCTGCTGCAAAT  
>C10\_16\_F  
TCGTCGGCAGCGTCAGATGTGTATAAGAGACAGAAAGTGTCCATGGACTCGAACATACA  
>C10\_16\_R  
GTCTCGTGGGCTCGGAGATGTGTATAAGAGACAGACACAGGGTAAATGAAGCTGTTGAT  
>C10\_17\_F  
TCGTCGGCAGCGTCAGATGTGTATAAGAGACAGAAACAAATGTGGTGGCATTAGCAGA  
>C10\_17\_R  
GTCTCGTGGGCTCGGAGATGTGTATAAGAGACAGGTCTGTGGACAAGCTCACATACAAT  
>C10\_18\_F  
TCGTCGGCAGCGTCAGATGTGTATAAGAGACAGGGTCTGAGGTAAGATCCTACGAACT  
>C10\_18\_R  
GTCTCGTGGGCTCGGAGATGTGTATAAGAGACAGCGGTGTCCACACTTCACTAAGATCA  
>C10\_19\_F  
TCGTCGGCAGCGTCAGATGTGTATAAGAGACAGTGACTCAGTCTCAAACAAGTTGTGA  
>C10\_19\_R  
GTCTCGTGGGCTCGGAGATGTGTATAAGAGACAGCTTCAGCAAATTCAAACCCCCATGA  
>C10\_20\_F  
TCGTCGGCAGCGTCAGATGTGTATAAGAGACAGATTTCAAGGGATACGAGAAGACCCC  
>C10\_20\_R  
GTCTCGTGGGCTCGGAGATGTGTATAAGAGACAGCATAAGGCACATTGCGATTGACTCT  
>C11\_1\_F  
TCGTCGGCAGCGTCAGATGTGTATAAGAGACAGGTGTTGGGCTGAGAACAATGAGAAG  
>C11\_1\_R  
GTCTCGTGGGCTCGGAGATGTGTATAAGAGACAGAAATTAAGACTACAATCGCAGCGGG  
>C11\_2\_F  
TCGTCGGCAGCGTCAGATGTGTATAAGAGACAGCTCAAGTCTTCCCTATAGCCCCTG  
>C11\_2\_R  
GTCTCGTGGGCTCGGAGATGTGTATAAGAGACAGTGCTGCAGAAATGATTGAAGAGGAA  
>C11\_3\_F  
TCGTCGGCAGCGTCAGATGTGTATAAGAGACAGGATTCTGCACCCGGTTTGAGCTTC  
>C11\_3\_R  
GTCTCGTGGGCTCGGAGATGTGTATAAGAGACAGGTCCGCCGATCAAAAGGTTCTG  
>C11\_4\_F  
TCGTCGGCAGCGTCAGATGTGTATAAGAGACAGTGCTGGATACTACAGTGTCAGGTTTCA  
>C11\_4\_R  
GTCTCGTGGGCTCGGAGATGTGTATAAGAGACAGACCATAAAGAGACTAGGAATGAGAGGC  
>C11\_5\_F  
TCGTCGGCAGCGTCAGATGTGTATAAGAGACAGAAAGCAACATAATGGCCATCAGTAGT  
>C11\_5\_R  
GTCTCGTGGGCTCGGAGATGTGTATAAGAGACAGGGTGTTATAGAGACCTTTGGAAAACCTTC

>C11\_6\_F  
TCGTCGGCAGCGTCAGATGTGTATAAGAGACAGTCGAAGAAGGACCAGTCTGATTCTT  
>C11\_6\_R  
GTCTCGTGGGCTCGGAGATGTGTATAAGAGACAGGCTCTCGAGGGTTTTGTAAAGCC  
>C11\_7\_F  
TCGTCGGCAGCGTCAGATGTGTATAAGAGACAGCCAAGGATGAAATGCAATCTCTTTGG  
>C11\_7\_R  
GTCTCGTGGGCTCGGAGATGTGTATAAGAGACAGATCAAGTGGAAAGGCTCAAAGGG  
>C11\_8\_F  
TCGTCGGCAGCGTCAGATGTGTATAAGAGACAGATATTCGGGATCATGGCAGAGTTCA  
>C11\_8\_R  
GTCTCGTGGGCTCGGAGATGTGTATAAGAGACAGCAGCTCCTACTATATCGCAACCAGA  
>C11\_9\_F  
TCGTCGGCAGCGTCAGATGTGTATAAGAGACAGTCTCCTGACCATCACCAGATCTAGT  
>C11\_9\_R  
GTCTCGTGGGCTCGGAGATGTGTATAAGAGACAGAACTGTGAGCAAAATGAGGAGTGTG  
>C11\_10\_F  
TCGTCGGCAGCGTCAGATGTGTATAAGAGACAGCAACCGGTGGTCTGAGGACAGTTAC  
>C11\_10\_R  
GTCTCGTGGGCTCGGAGATGTGTATAAGAGACAGTAGCTTGTGCGTTTGTATTGGATT  
>C11\_11\_F  
TCGTCGGCAGCGTCAGATGTGTATAAGAGACAGAACTGCAGAGAGACAATTTGGC  
>C11\_11\_R  
GTCTCGTGGGCTCGGAGATGTGTATAAGAGACAGCATGAACCGTTGCCGTTTTTGTCTC  
>C11\_12\_F  
TCGTCGGCAGCGTCAGATGTGTATAAGAGACAGGGGTTCTGGAAATGTGTGTATGTT  
>C11\_12\_R  
GTCTCGTGGGCTCGGAGATGTGTATAAGAGACAGAGCATGAAGTCCTTTTGAAGAATGT  
>C11\_13\_F  
TCGTCGGCAGCGTCAGATGTGTATAAGAGACAGTGTTTTTAAGCAGTGCAGTCATGGA  
>C11\_13\_R  
GTCTCGTGGGCTCGGAGATGTGTATAAGAGACAGAGAACATTTTCAGGGCTTCCTCAA  
>C11\_14\_F  
TCGTCGGCAGCGTCAGATGTGTATAAGAGACAGTTAAACAACTCAATCGACCACTCCA  
>C11\_14\_R  
GTCTCGTGGGCTCGGAGATGTGTATAAGAGACAGTGAAGAGACGGCGAGATTTTGGATA  
>C11\_15\_F  
TCGTCGGCAGCGTCAGATGTGTATAAGAGACAGCAATTCCTGAATCTGAATGTGCTGT  
>C11\_15\_R  
GTCTCGTGGGCTCGGAGATGTGTATAAGAGACAGCCTTAAAAGGCCACAATTTGATGTCAC  
>C11\_16\_F  
TCGTCGGCAGCGTCAGATGTGTATAAGAGACAGACAAAGCTGGAGCACTTAAAGAAGG  
>C11\_16\_R  
GTCTCGTGGGCTCGGAGATGTGTATAAGAGACAGAACTCTCCATCGACCTGAACAAG  
>C11\_17\_F  
TCGTCGGCAGCGTCAGATGTGTATAAGAGACAGTTAGTGCTACCTGCTCCTTTCTTGT  
>C11\_17\_R  
GTCTCGTGGGCTCGGAGATGTGTATAAGAGACAGAGCGTAAAAATGGCAGTGAGTTTGA  
>C11\_18\_F  
TCGTCGGCAGCGTCAGATGTGTATAAGAGACAGGCATTAGCTAGAACTGACTGAGTACT  
>C11\_18\_R  
GTCTCGTGGGCTCGGAGATGTGTATAAGAGACAGGGTTTTAGAGTCCAGATGTGTTAGCC  
>C11\_19\_F  
TCGTCGGCAGCGTCAGATGTGTATAAGAGACAGTTGAAAATATGCAATGGCCCTTCCC  
>C11\_19\_R  
GTCTCGTGGGCTCGGAGATGTGTATAAGAGACAGGAGGTCCATGAAGCTGTAGAGTCAT  
>C11\_20\_F

TCGTCGGCAGCGTCAGATGTGTATAAGAGACAGATCCACAAAGAAGGGAACATGATGC  
>C11\_20\_R  
GTCTCGTGGGCTCGGAGATGTGTATAAGAGACAGGAGGTTGTGTGAGTCTCATCTTTGC  
>C11\_21\_F  
TCGTCGGCAGCGTCAGATGTGTATAAGAGACAGTGGTGGGCATGTATCTTTAACGGAT  
>C11\_21\_R  
GTCTCGTGGGCTCGGAGATGTGTATAAGAGACAGGCTGTCCAAATAACCAAAACAGTGT  
>C11\_22\_F  
TCGTCGGCAGCGTCAGATGTGTATAAGAGACAGCTGTTACCGTTCAAAGCTTGATGGT  
>C11\_22\_R  
GTCTCGTGGGCTCGGAGATGTGTATAAGAGACAGACCCCTTACCAACACATCTTGACCAT  
>C12\_1\_F  
TCGTCGGCAGCGTCAGATGTGTATAAGAGACAGTCCTTGTCTAACAAAACCCCATTTCTG  
>C12\_1\_R  
GTCTCGTGGGCTCGGAGATGTGTATAAGAGACAGCAGGGCCATCGATTTTCAGATTCTTC  
>C12\_2\_F  
TCGTCGGCAGCGTCAGATGTGTATAAGAGACAGTCAGTACTCAGAACATTGCCTCCAC  
>C12\_2\_R  
GTCTCGTGGGCTCGGAGATGTGTATAAGAGACAGCTCATTTTGAGCTTCCTTCTCCACC  
>C12\_3\_F  
TCGTCGGCAGCGTCAGATGTGTATAAGAGACAGCTGCTGACACCAGTTTGCAAATGAT  
>C12\_3\_R  
GTCTCGTGGGCTCGGAGATGTGTATAAGAGACAGCCTTCAAAGTCGAAGTCAGAAGTCA  
>C12\_4\_F  
TCGTCGGCAGCGTCAGATGTGTATAAGAGACAGGACGTACTGTTGAAATTGTGAACA  
>C12\_4\_R  
GTCTCGTGGGCTCGGAGATGTGTATAAGAGACAGACATCAAAGAAGAAACCACCAACCA  
>C12\_5\_F  
TCGTCGGCAGCGTCAGATGTGTATAAGAGACAGGCTTGACTTCACATCGCGATGAAT  
>C12\_5\_R  
GTCTCGTGGGCTCGGAGATGTGTATAAGAGACAGGGAGCTTGGATATATGGCTTCACTC  
>C12\_6\_F  
TCGTCGGCAGCGTCAGATGTGTATAAGAGACAGTGCATAAATGACCTTCTCTTGAGGC  
>C12\_6\_R  
GTCTCGTGGGCTCGGAGATGTGTATAAGAGACAGTAACTAGCACTCATTGGCCCTTTTT  
>C12\_7\_F  
TCGTCGGCAGCGTCAGATGTGTATAAGAGACAGATTTGGTTGTTTACTCAGGGTCCCA  
>C12\_7\_R  
GTCTCGTGGGCTCGGAGATGTGTATAAGAGACAGATATGCTCAAATGACTTTGCAGCCA  
>C12\_8\_F  
TCGTCGGCAGCGTCAGATGTGTATAAGAGACAGTCAAATGAAGAGAGCAAACCTTGTGC  
>C12\_8\_R  
GTCTCGTGGGCTCGGAGATGTGTATAAGAGACAGGGTCCACATCCCGAGATTTTCCTAT  
>C12\_9\_F  
TCGTCGGCAGCGTCAGATGTGTATAAGAGACAGCCGCATCAGTGTGAGTCAATGTAAA  
>C12\_9\_R  
GTCTCGTGGGCTCGGAGATGTGTATAAGAGACAGATATGTTTCGCGCCCTGAGGTTATT  
>C12\_10\_F  
TCGTCGGCAGCGTCAGATGTGTATAAGAGACAGTTTTCGCCCCGGATGTGTCATTC  
>C12\_10\_R  
GTCTCGTGGGCTCGGAGATGTGTATAAGAGACAGAGAGCTTATTAGAACGAGGAGTCCA  
>C12\_11\_F  
TCGTCGGCAGCGTCAGATGTGTATAAGAGACAGTGCCGAGTCAAACCTAAGACAAACAT  
>C12\_11\_R  
GTCTCGTGGGCTCGGAGATGTGTATAAGAGACAGTGTACATTTGCTTCTTGCTGGATT  
>C12\_12\_F  
TCGTCGGCAGCGTCAGATGTGTATAAGAGACAGTGATTTCTGTATCCCTGGATTGGAGA

>C12\_12\_R  
 GTCTCGTGGGCTCGGAGATGTGTATAAGAGACAGACCAAAGCTATTAGTTGACACCATGG  
 >C12\_13\_F  
 TCGTCGGCAGCGTCAGATGTGTATAAGAGACAGGCAATGAAGAAGGAGTTCCGCC  
 >C12\_13\_R  
 GTCTCGTGGGCTCGGAGATGTGTATAAGAGACAGCTGGCACTATAAGATCATAACGTGTTTAGG  
 >C12\_14\_F  
 TCGTCGGCAGCGTCAGATGTGTATAAGAGACAGAGTGTTCTTCGGTAGATTGTTCACT  
 >C12\_14\_R  
 GTCTCGTGGGCTCGGAGATGTGTATAAGAGACAGGTGACAATGGTGAGAGTTGAAAGGG  
 >C12\_15\_F  
 TCGTCGGCAGCGTCAGATGTGTATAAGAGACAGGCTACTATCATTCTATCTGAAACCTGGTAG  
 >C12\_15\_R  
 GTCTCGTGGGCTCGGAGATGTGTATAAGAGACAGCTTCAAATCATAGGCAAGCTCAGCT  
 >C12\_16\_F  
 TCGTCGGCAGCGTCAGATGTGTATAAGAGACAGTGGAATAATCACTACTTGGTTCCTCC  
 >C12\_16\_R  
 GTCTCGTGGGCTCGGAGATGTGTATAAGAGACAGTACCAACTAGTTTGCTCTGAGGCAT  
 >C12\_17\_F  
 TCGTCGGCAGCGTCAGATGTGTATAAGAGACAGCCCATTCACTTGTTTCCTAAATTCATCCC  
 >C12\_17\_R  
 GTCTCGTGGGCTCGGAGATGTGTATAAGAGACAGAACCTGACAAGTGAAGCGTGGG  
 >C12\_18\_1\_F  
 TCGTCGGCAGCGTCAGATGTGTATAAGAGACAGAAAGTGGACCACCGAATACTTTGTCC  
 >C12\_18\_1\_R  
 GTCTCGTGGGCTCGGAGATGTGTATAAGAGACAGACTGGTCGCAGTTGTGAAAATTGTG  
 >C12\_19\_F  
 TCGTCGGCAGCGTCAGATGTGTATAAGAGACAGATGTAATCGCCCTGATCCAACGTGT  
 >C12\_19\_R  
 GTCTCGTGGGCTCGGAGATGTGTATAAGAGACAGGTACATGCACAAAGACGAGCTTTCT  
 >C12\_20\_F  
 TCGTCGGCAGCGTCAGATGTGTATAAGAGACAGGTCTTTTTGTTGCAGAGGGAAAGAT  
 >C12\_20\_R  
 GTCTCGTGGGCTCGGAGATGTGTATAAGAGACAGTTGGAGGCCTAATCACATGACTGAA  
 >C12\_21\_F  
 TCGTCGGCAGCGTCAGATGTGTATAAGAGACAGCTCCAGCTCCTCTTGAACCTTTCTT  
 >C12\_21\_R  
 GTCTCGTGGGCTCGGAGATGTGTATAAGAGACAGGCACTGATTCATGAGCATAAGGTATG  
 >C12\_22\_F  
 TCGTCGGCAGCGTCAGATGTGTATAAGAGACAGTGGTGCTGAAGATGATGCAACTTTT  
 >C12\_22\_R  
 GTCTCGTGGGCTCGGAGATGTGTATAAGAGACAGGAGGAGCCAAAGCGTCCTATCAAA  
 >C12\_23\_F  
 TCGTCGGCAGCGTCAGATGTGTATAAGAGACAGCAGCGAAACTGCTATCACACTGTT  
 >C12\_23\_R  
 GTCTCGTGGGCTCGGAGATGTGTATAAGAGACAGTCCTTCACTGTTCTCATTCCAT

#### PCR2: i5-Primers

>A1\_ATCACG  
 AATGATACGGCGACCACCGAGATCTACACATCACGTCTCGTCGGCAGCGTC  
 >B1\_CGATGT  
 AATGATACGGCGACCACCGAGATCTACACCGATGTTCTCGTCGGCAGCGTC  
 >C1\_TTAGGC  
 AATGATACGGCGACCACCGAGATCTACACTTAGGCTCGTCGGCAGCGTC  
 >D1\_TGACCA  
 AATGATACGGCGACCACCGAGATCTACACTGACCATCGTCGGCAGCGTC  
 >E1\_ACAGTG

AATGATACGGCGACCACCGAGATCTACACACAGTGTCTCGTCGGCAGCGTC  
>F1\_GCCAAT  
AATGATACGGCGACCACCGAGATCTACACGCCAATTCGTCTCGGCAGCGTC  
>G1\_CAGATC  
AATGATACGGCGACCACCGAGATCTACACCAGATCTCGTCGGCAGCGTC  
>H1\_ACTTGA  
AATGATACGGCGACCACCGAGATCTACACACTTGATCGTCGGCAGCGTC  
>A2\_GATCAG  
AATGATACGGCGACCACCGAGATCTACACGATCAGTCGTCTCGGCAGCGTC  
>B2\_TAGCTT  
AATGATACGGCGACCACCGAGATCTACACTAGCTTTCGTCTCGGCAGCGTC  
>C2\_GGCTAC  
AATGATACGGCGACCACCGAGATCTACACGGCTACTCGTCGGCAGCGTC  
>D2\_CTTGTA  
AATGATACGGCGACCACCGAGATCTACACCTTGTATCGTCGGCAGCGTC  
>E2\_AGTCAA  
AATGATACGGCGACCACCGAGATCTACACAGTCAATCGTCGGCAGCGTC  
>F2\_AGTTCC  
AATGATACGGCGACCACCGAGATCTACACAGTTCCTCGTCGGCAGCGTC  
>G2\_ATGTCA  
AATGATACGGCGACCACCGAGATCTACACATGTCATCGTCGGCAGCGTC  
>H2\_CCGTCC  
AATGATACGGCGACCACCGAGATCTACACCCGTCCTCGTCGGCAGCGTC  
>A3\_GTAGAG  
AATGATACGGCGACCACCGAGATCTACACGTAGAGTCGTCTCGGCAGCGTC  
>B3\_GTCCGC  
AATGATACGGCGACCACCGAGATCTACACGTCCGCTCGTCGGCAGCGTC  
>C3\_GTGAAA  
AATGATACGGCGACCACCGAGATCTACACGTGAAATCGTCGGCAGCGTC  
>D3\_GTGGCC  
AATGATACGGCGACCACCGAGATCTACACGTGGCCTCGTCGGCAGCGTC  
>E3\_GTTTCG  
AATGATACGGCGACCACCGAGATCTACACGTTTCGTCTCGTCGGCAGCGTC  
>F3\_CGTACG  
AATGATACGGCGACCACCGAGATCTACACCGTACGTCTCGTCGGCAGCGTC  
>G3\_GAGTGG  
AATGATACGGCGACCACCGAGATCTACACGAGTGGTCGTCTCGGCAGCGTC  
>H3\_GGTAGC  
AATGATACGGCGACCACCGAGATCTACACGGTAGCTCGTCGGCAGCGTC  
>A4\_ACTGAT  
AATGATACGGCGACCACCGAGATCTACACACTGATTCGTCTCGGCAGCGTC  
>B4\_ATGAGC  
AATGATACGGCGACCACCGAGATCTACACATGAGCTCGTCGGCAGCGTC  
>C4\_ATTCTT  
AATGATACGGCGACCACCGAGATCTACACATTCTTCGTCTCGGCAGCGTC  
>D4\_CAAAAG  
AATGATACGGCGACCACCGAGATCTACACCAAAGTCGTCTCGGCAGCGTC  
>E4\_CAACTA  
AATGATACGGCGACCACCGAGATCTACACCAACTATCGTCGGCAGCGTC  
>F4\_CACCGG  
AATGATACGGCGACCACCGAGATCTACACACCGGTCGTCTCGGCAGCGTC  
>G4\_CACGAT  
AATGATACGGCGACCACCGAGATCTACACACGATTCGTCTCGGCAGCGTC  
>H4\_CACTCA  
AATGATACGGCGACCACCGAGATCTACACCACTCATCGTCGGCAGCGTC  
>A5\_CAGGCG  
AATGATACGGCGACCACCGAGATCTACACCAGGCGTCGTCTCGGCAGCGTC

>B5\_CATGGC  
AATGATACGGCGACCACCGAGATCTACACCATGGCTCGTCGGCAGCGTC  
>C5\_CATTTT  
AATGATACGGCGACCACCGAGATCTACACCATTTTTTCGTCGGCAGCGTC  
>D5\_CCAACA  
AATGATACGGCGACCACCGAGATCTACACCCAACATCGTCGGCAGCGTC  
>E5\_CGGAAT  
AATGATACGGCGACCACCGAGATCTACACCGGAATTCGTCGGCAGCGTC  
>F5\_CTAGCT  
AATGATACGGCGACCACCGAGATCTACACCTAGCTTCGTCGGCAGCGTC  
>G5\_CTATAC  
AATGATACGGCGACCACCGAGATCTACACCTATACTCGTCGGCAGCGTC  
>H5\_CTCAGA  
AATGATACGGCGACCACCGAGATCTACACCTCAGATCGTCGGCAGCGTC  
>A6\_GACGAC  
AATGATACGGCGACCACCGAGATCTACACGACGACTCGTCGGCAGCGTC  
>B6\_TAATCG  
AATGATACGGCGACCACCGAGATCTACACTAATCGTCGTCGGCAGCGTC  
>C6\_TACAGC  
AATGATACGGCGACCACCGAGATCTACACTACAGCTCGTCGGCAGCGTC  
>D6\_TATAAT  
AATGATACGGCGACCACCGAGATCTACACTATAATTCGTCGGCAGCGTC  
>E6\_TCATT  
AATGATACGGCGACCACCGAGATCTACACTCATTCTCGTCGGCAGCGTC  
>F6\_TCCCGA  
AATGATACGGCGACCACCGAGATCTACACTCCCGATCGTCGGCAGCGTC  
>G6\_TCGAAG  
AATGATACGGCGACCACCGAGATCTACACTCGAAGTCGTCGGCAGCGTC  
>H6\_TCGGCA  
AATGATACGGCGACCACCGAGATCTACACTCGGCATCGTCGGCAGCGTC  
>A7\_AAGTAC  
AATGATACGGCGACCACCGAGATCTACACAAGTACTCGTCGGCAGCGTC  
>B7\_TGCCAT  
AATGATACGGCGACCACCGAGATCTACACTGCCATTCTCGTCGGCAGCGTC  
>C7\_CTCCTT  
AATGATACGGCGACCACCGAGATCTACACCTCCTTTTCGTCGGCAGCGTC  
>D7\_AGATAG  
AATGATACGGCGACCACCGAGATCTACACAGATAGTCGTCGGCAGCGTC  
>E7\_GATATA  
AATGATACGGCGACCACCGAGATCTACACGATATATCGTCGGCAGCGTC  
>F7\_ATAATA  
AATGATACGGCGACCACCGAGATCTACACATAATATCGTCGGCAGCGTC  
>G7\_GGTGCT  
AATGATACGGCGACCACCGAGATCTACACGGTGCTTCGTCGGCAGCGTC  
>H7\_TGTGGA  
AATGATACGGCGACCACCGAGATCTACACTGTGGATCGTCGGCAGCGTC  
>A8\_CGAGAA  
AATGATACGGCGACCACCGAGATCTACACCGAGAATCGTCGGCAGCGTC  
>B8\_GCAGGA  
AATGATACGGCGACCACCGAGATCTACACGCAGGATCGTCGGCAGCGTC  
>C8\_GCCGCG  
AATGATACGGCGACCACCGAGATCTACACGCCGCGTCGTCGGCAGCGTC  
>D8\_AGCGCA  
AATGATACGGCGACCACCGAGATCTACACAGCGCATCGTCGGCAGCGTC  
>E8\_TCCGTT  
AATGATACGGCGACCACCGAGATCTACACTCCGTTTCGTCGGCAGCGTC  
>F8\_ATCGTC

AATGATACGGCGACCACCGAGATCTACACATCGTCTCGTCGGCAGCGTC  
>G8\_CCGCAA  
AATGATACGGCGACCACCGAGATCTACACCCGCAATCGTCGGCAGCGTC  
>H8\_AACTTG  
AATGATACGGCGACCACCGAGATCTACACAACTTGTCGTCTCGTCGGCAGCGTC  
>A9\_AAGGTA  
AATGATACGGCGACCACCGAGATCTACACAAGGTATCGTCGGCAGCGTC  
>B9\_GCGCTC  
AATGATACGGCGACCACCGAGATCTACACGCGCTCTCGTCGGCAGCGTC  
>C9\_CCTCGT  
AATGATACGGCGACCACCGAGATCTACACCCTCGTTCGTCTCGTCGGCAGCGTC  
>D9\_ACGATT  
AATGATACGGCGACCACCGAGATCTACACACGATTTCTCGTCGGCAGCGTC  
>E9\_AGACTC  
AATGATACGGCGACCACCGAGATCTACACAGACTCTCGTCGGCAGCGTC  
>F9\_TGGTCT  
AATGATACGGCGACCACCGAGATCTACACTGGTCTTCGTCTCGTCGGCAGCGTC  
>G9\_GGAATT  
AATGATACGGCGACCACCGAGATCTACACGGAATTTCTCGTCGGCAGCGTC  
>H9\_ACATCT  
AATGATACGGCGACCACCGAGATCTACACACATCTTCGTCTCGTCGGCAGCGTC  
>A10\_TTCTCC  
AATGATACGGCGACCACCGAGATCTACACTTCTCCTCGTCGGCAGCGTC  
>B10\_ATCTAT  
AATGATACGGCGACCACCGAGATCTACACATCTATTCGTCTCGTCGGCAGCGTC  
>C10\_TGCATA  
AATGATACGGCGACCACCGAGATCTACACTGCATATCGTCGGCAGCGTC  
>D10\_AATAGG  
AATGATACGGCGACCACCGAGATCTACACAATAGGTCGTCTCGTCGGCAGCGTC  
>E10\_CGGTTA  
AATGATACGGCGACCACCGAGATCTACACCGGTTATCGTCGGCAGCGTC  
>F10\_GAGACT  
AATGATACGGCGACCACCGAGATCTACACGAGACTTCGTCTCGTCGGCAGCGTC  
>G10\_GCTCCA  
AATGATACGGCGACCACCGAGATCTACACGCTCCATCGTCGGCAGCGTC  
>H10\_ATGCAG  
AATGATACGGCGACCACCGAGATCTACACATGCAGTCGTCTCGTCGGCAGCGTC  
>A11\_GGCCTG  
AATGATACGGCGACCACCGAGATCTACACGGCCTGTCTCGTCGGCAGCGTC  
>B11\_TTACTG  
AATGATACGGCGACCACCGAGATCTACACTTACTGTCTCGTCGGCAGCGTC  
>C11\_TCAAGT  
AATGATACGGCGACCACCGAGATCTACACTCAAGTTCGTCTCGTCGGCAGCGTC  
>D11\_AGCAGT  
AATGATACGGCGACCACCGAGATCTACACAGCAGTTCGTCTCGTCGGCAGCGTC  
>E11\_CCTTAG  
AATGATACGGCGACCACCGAGATCTACACCCTTAGTCGTCTCGTCGGCAGCGTC  
>F11\_TTGGAT  
AATGATACGGCGACCACCGAGATCTACACTTGGATTCTCGTCGGCAGCGTC  
>G11\_TCTCAC  
AATGATACGGCGACCACCGAGATCTACACTCTCACTCGTCGGCAGCGTC  
>H11\_GTCTTA  
AATGATACGGCGACCACCGAGATCTACACGTCTTATCGTCGGCAGCGTC  
>A12\_CTAACG  
AATGATACGGCGACCACCGAGATCTACACCTAACGTCTCGTCGGCAGCGTC  
>B12\_ATACAC  
AATGATACGGCGACCACCGAGATCTACACATACTCGTCGGCAGCGTC

>C12\_GCATTCT  
 AATGATACGGCGACCACCGAGATCTACACGCATTCTCGTCGGCAGCGTC  
 >D12\_TACTCT  
 AATGATACGGCGACCACCGAGATCTACACTACTCTTCGTCGGCAGCGTC  
 >E12\_TGGACT  
 AATGATACGGCGACCACCGAGATCTACACTGGACTTCGTCGGCAGCGTC  
 >F12\_CCATAG  
 AATGATACGGCGACCACCGAGATCTACACCCATAGTCGTCGGCAGCGTC  
 >G12\_TAAGGT  
 AATGATACGGCGACCACCGAGATCTACACTAAGGTTCGTCGGCAGCGTC  
 >H12\_TTGCG  
 AATGATACGGCGACCACCGAGATCTACACTTGGCGTCGTCGGCAGCGTC

#### PCR2: i7-Primers

>pl1\_ATCACG  
 CAAGCAGAAGACGGCATACGAGATCGTGATGTCTCGTGGGCTCGG  
 >pl2\_CGATGT  
 CAAGCAGAAGACGGCATACGAGATACATCGGTCTCGTGGGCTCGG  
 >pl3\_TTAGGC  
 CAAGCAGAAGACGGCATACGAGATGCCTAAGTCTCGTGGGCTCGG  
 >pl4\_TGACCA  
 CAAGCAGAAGACGGCATACGAGATTGGTCAGTCTCGTGGGCTCGG  
 >pl5\_ACAGTG  
 CAAGCAGAAGACGGCATACGAGATCACTGTGTCTCGTGGGCTCGG  
 >pl6\_GCCAAT  
 CAAGCAGAAGACGGCATACGAGATATTGGCGTCTCGTGGGCTCGG  
 >pl7\_GACATC  
 CAAGCAGAAGACGGCATACGAGATGATGTCTCGTGGGCTCGG  
 >pl8\_ACTTGA  
 CAAGCAGAAGACGGCATACGAGATTCAAGTGTCTCGTGGGCTCGG  
 >pl9\_GATCAG  
 CAAGCAGAAGACGGCATACGAGATCTGATCGTCTCGTGGGCTCGG  
 >pl10\_TAGCTT  
 CAAGCAGAAGACGGCATACGAGATAAGCTAGTCTCGTGGGCTCGG

#### PCR1: PotatoMASH primers for selected pest resistance markers *(Note the first two pairs in chromosome IV are part of the core panel)*

>C2\_B2\_F  
 TCGTCGGCAGCGTCAGATGTGTATAAGAGACAGGAGGCAACAAAGAGTTATTATGGCTTG  
 >C2\_B2\_R  
 GTCTCGTGGGCTCGGAGATGTGTATAAGAGACAGGTGGTTTCAGCCCTTGTCTTAAGAA  
 >C2\_B3\_F  
 TCGTCGGCAGCGTCAGATGTGTATAAGAGACAGAATGTGTGCAAGATCCTTGTCCTG  
 >C2\_B3\_R  
 GTCTCGTGGGCTCGGAGATGTGTATAAGAGACAGTCCTGGAAAAGCTTGTTATTGCTGA  
 >C4\_5\_C4\_B1\_F  
 TCGTCGGCAGCGTCAGATGTGTATAAGAGACAGAGTAGTTTACTCATGGGTTCTCGTTC  
 >C4\_5\_C4\_B1\_R  
 GTCTCGTGGGCTCGGAGATGTGTATAAGAGACAGACTCAAATGGGTTGAAATCATCAGACC  
 >C4\_6\_C4\_B2\_F  
 TCGTCGGCAGCGTCAGATGTGTATAAGAGACAGCTGATAAGCAGCCTATTGTGCCATG  
 >C4\_6\_C4\_B2\_R  
 GTCTCGTGGGCTCGGAGATGTGTATAAGAGACAGGCCAACTAAATTCAGCAAATGTAATTTACT  
 >C5\_B9\_1\_F  
 TCGTCGGCAGCGTCAGATGTGTATAAGAGACAGGCAGAGAAAAGAAGAGCTGCGAAA  
 >C5\_B9\_1\_R

GTCTCGTGGGCTCGGAGATGTGTATAAGAGACAGGCAATAAGCAGAATATACTATTGAATGAATAA  
>C5\_B10\_F  
TCGTCGGCAGCGTCAGATGTGTATAAGAGACAGAATTACATACATCAGTGCATCAAT  
>C5\_B10\_R  
GTCTCGTGGGCTCGGAGATGTGTATAAGAGACAGCGCATGTTTGAAACTCAGTAAGT  
>C6\_B1\_F  
TCGTCGGCAGCGTCAGATGTGTATAAGAGACAGTTCTCAGATTCTGTCCTGTTTTGCC  
>C6\_B1\_R  
GTCTCGTGGGCTCGGAGATGTGTATAAGAGACAGCTTCAAAGTGGGAAGGACTCGAAAG  
>C11\_B1\_F  
TCGTCGGCAGCGTCAGATGTGTATAAGAGACAGGGTCAGGGTTCTTTGCTCTCTG  
>C11\_B1\_R  
GTCTCGTGGGCTCGGAGATGTGTATAAGAGACAGCCTCAAATTCTTTTCTATTGCTGATTGC  
>C11\_B3\_F  
TCGTCGGCAGCGTCAGATGTGTATAAGAGACAGGATAGGGGATAGAGGAATTGAAGCAT  
>C11\_B3\_R  
GTCTCGTGGGCTCGGAGATGTGTATAAGAGACAGGTTGTTGTTGGAGCAATTGTTGTTG  
>C12\_B6\_F  
TCGTCGGCAGCGTCAGATGTGTATAAGAGACAGGGTAGCCGTTGAAGCCTTAAAGAAG  
>C12\_B6\_R  
GTCTCGTGGGCTCGGAGATGTGTATAAGAGACAGTGGATTTAGCAACTTTTGATAGTTCA
